# Supplementary material for: Popigai and Chicxulub craters: multiple impacts and their associated grabens
Source: Copernicus journal article supplement (doi:10.5194/egusphere-2024-866), 2024-04-26
Supplement: Supplementary file 1 [file egusphere-2024-866-supplement.pdf]

# Chicxulub and Popigai

after 15 years\*

double or multiple impact craters?

\* Klokočník J., Kostelecký J., Pešek I., Novák P., Wagner C.A., Sebera J. 2010. Candidates for multiple impact craters?: Popigai and Chicxulub as seen by the global high resolution gravitational field model EGM08, *Solid Earth EGU* **1**, 71-83; DOI: 10.5194/se-1-71-2010. See also: Is Chicxulub a double impact crater? *6th EGU A. von Humboldt Internatl. Conf. on Climate Change, Natural Hazards, and Societies*, Mérida, México, Section: The Cretaceous/Tertiary Boundary and the Chicxulub Impact Crater, paper AvH6-5, 15 March 2010.

## 7 General Patterns of Impact Diamond Distribution

171

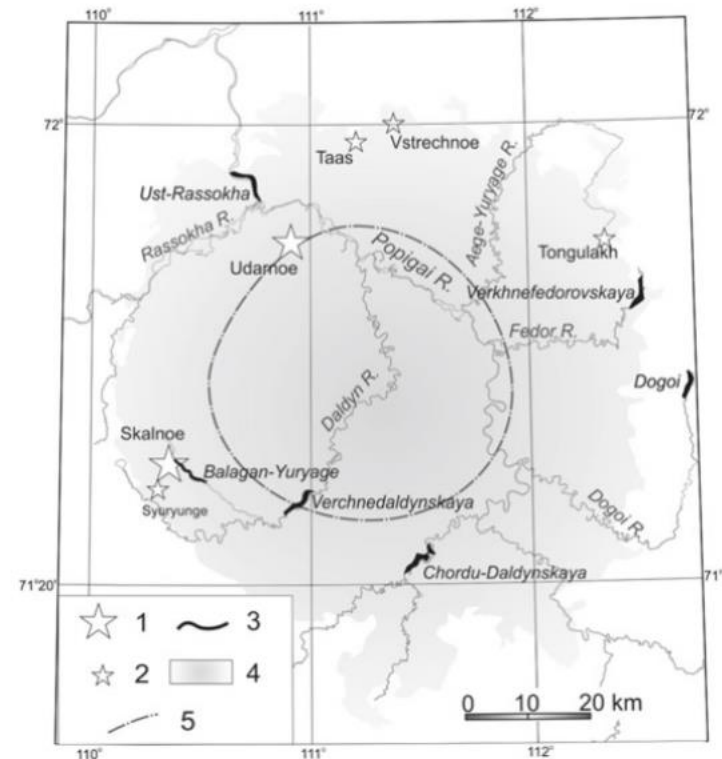

**Fig. 7.7** Impact diamond deposits in the Popigai area (modified from Masaitis et al. 2013).  
 1—Large indigenous diamond deposits with proved resources, 2—Small indigenous diamond deposits estimated tentatively, 3—Large diamond alluvial placers estimated tentatively, 4—Area of

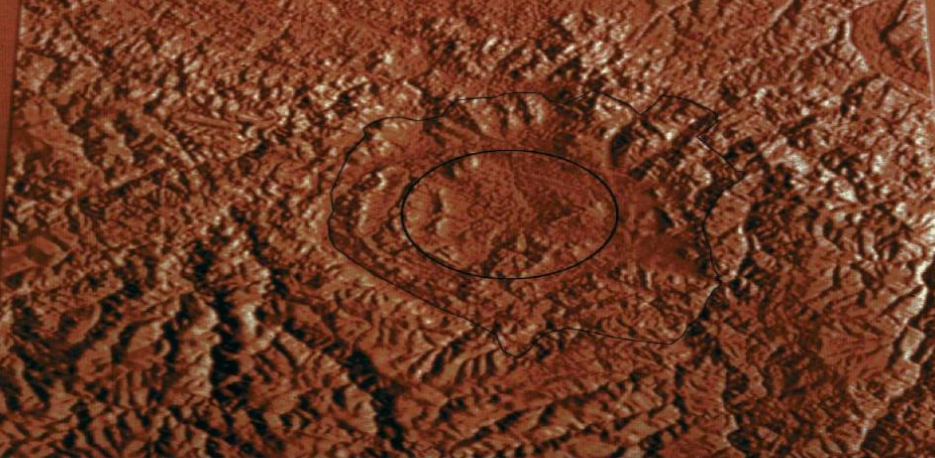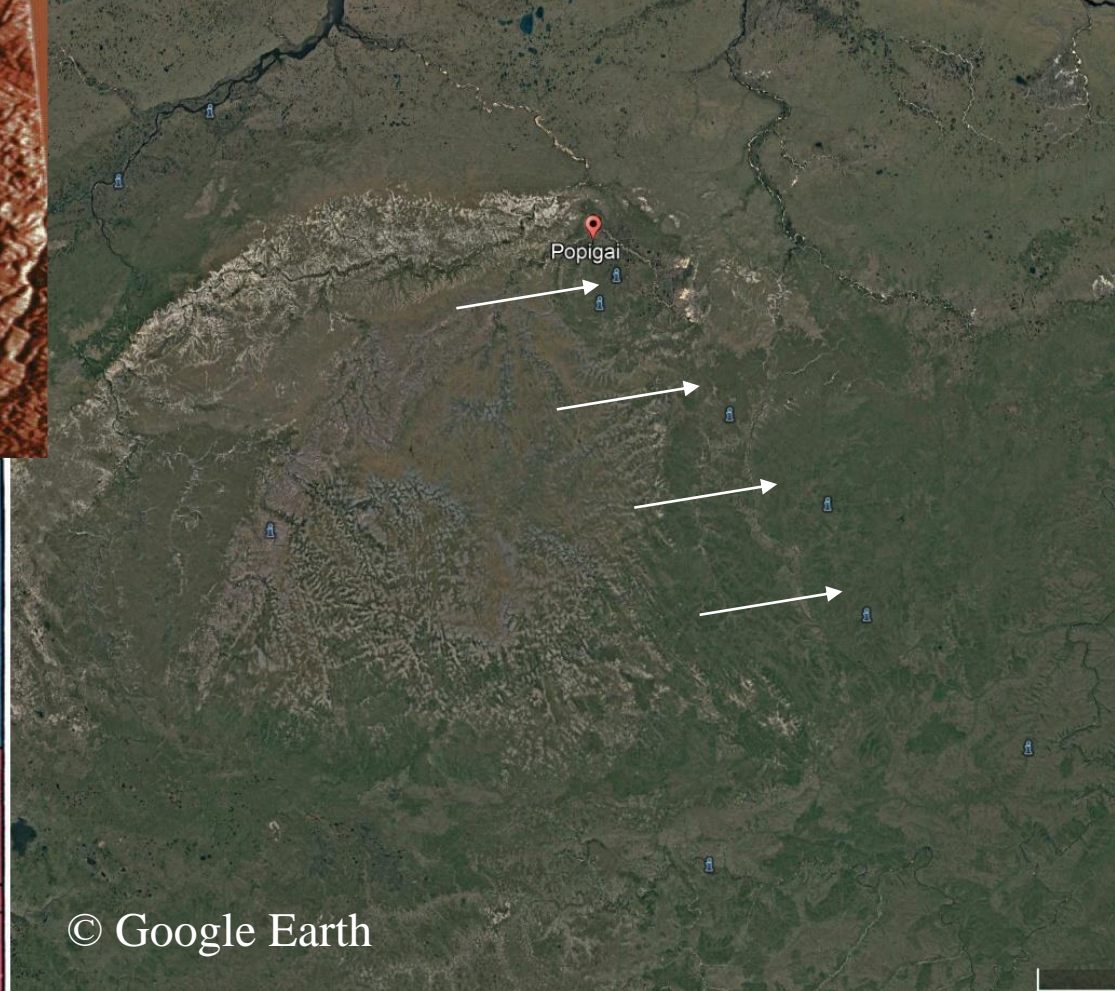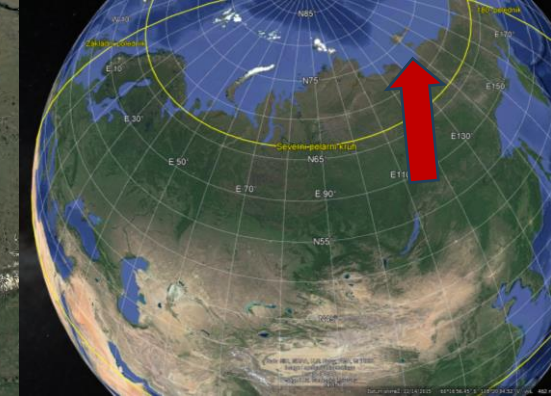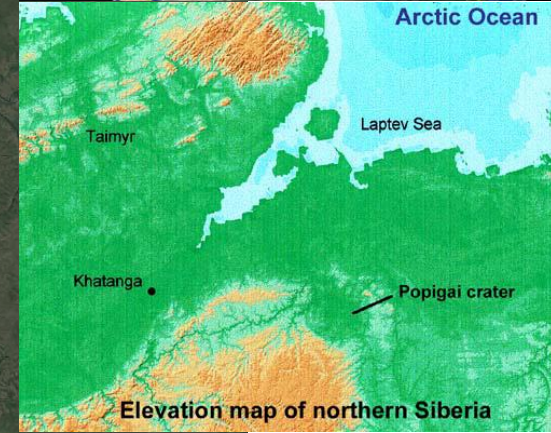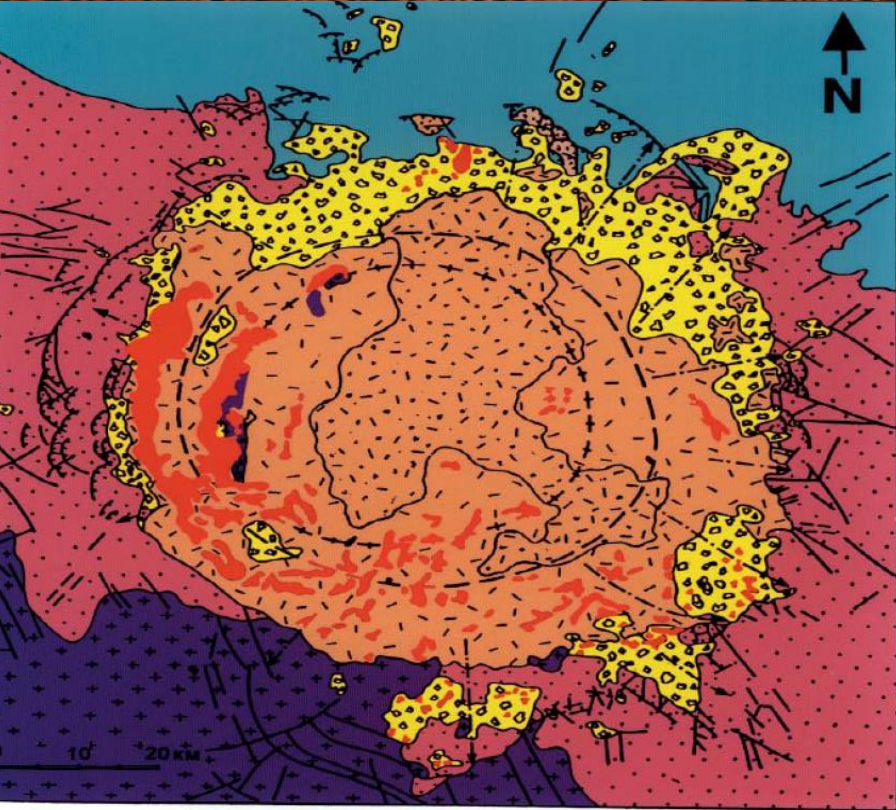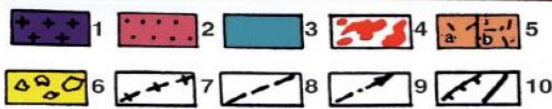

© Google Earth

*left*  
**Geological sketch map of the Popigai impact structure, modified after Masaitis et al. (1980).**  
 (1) Archean gneisses and schists; (2) Upper Proterozoic and Cambrian quartzites, dolomites, and limestones; (3) Permian sandstones and argillites with sills and dikes of Triassic dolerites; (4) tagamites; (5) suevites with lenses of fine-grained allogenic breccia, (6) allogenic breccia; (7) center line of annular uplift; (8) center line of annular trough, (9) axes of radial troughs; (10) thrusts, faults.

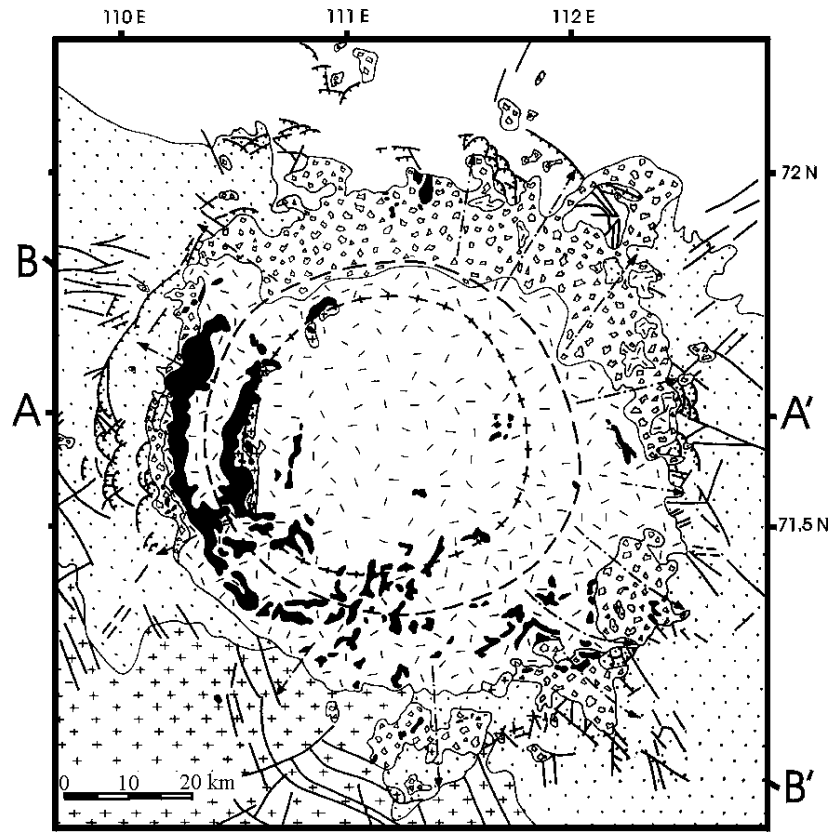

-  Archean gneisses and schists
-  Upper Proterozoic and Cambrian quartzites, dolomites and limestones
-  Permian sandstones and Triassic dolerite dykes
-  Tagamites
-  Suevites with lenses of coptoclastite
-  Allogenic breccia
-  Centre line of annular uplift
-  Centre line of annular trough
-  Axes of radial troughs
-  Thrusts, faults

# Popigai

geology of the main  
proved impact crater

71°38'N. 111°11'E  
crater center

North Central Siberia  
about 100 km from the coast  
of the Laptev Sea,  
an embayment of the Arctic Ocean.  
Late Eocene - 35.7 (± 0.2) Ma  
[by stepwise heating Ar-Ar].

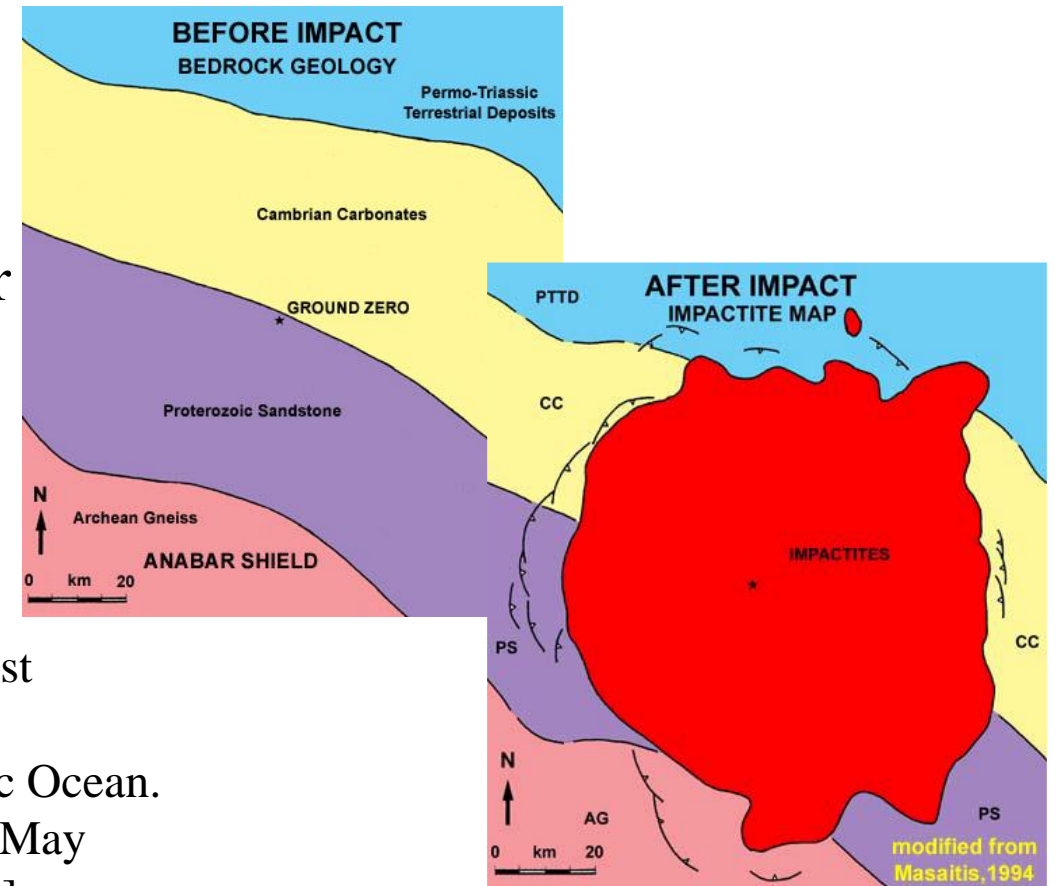

35.7-Ma-old and -100-km-wide multi-ring Popigai  
a well- preserved impact structure at the Anabar shield,  
central Arctic Siberia, filled with melted and shocked material  
that included shock-generated impact diamonds.  
Because the structure is exposed, but only slightly eroded,  
a variety of impactites are preserved  
and accessible for petrological studies.

*Geology of the Popigai impact structure, after Masaitis (1994).*

# ETOPO1 - Popigai

**POPIGAI**  
ETOPO 1  
topography [m]

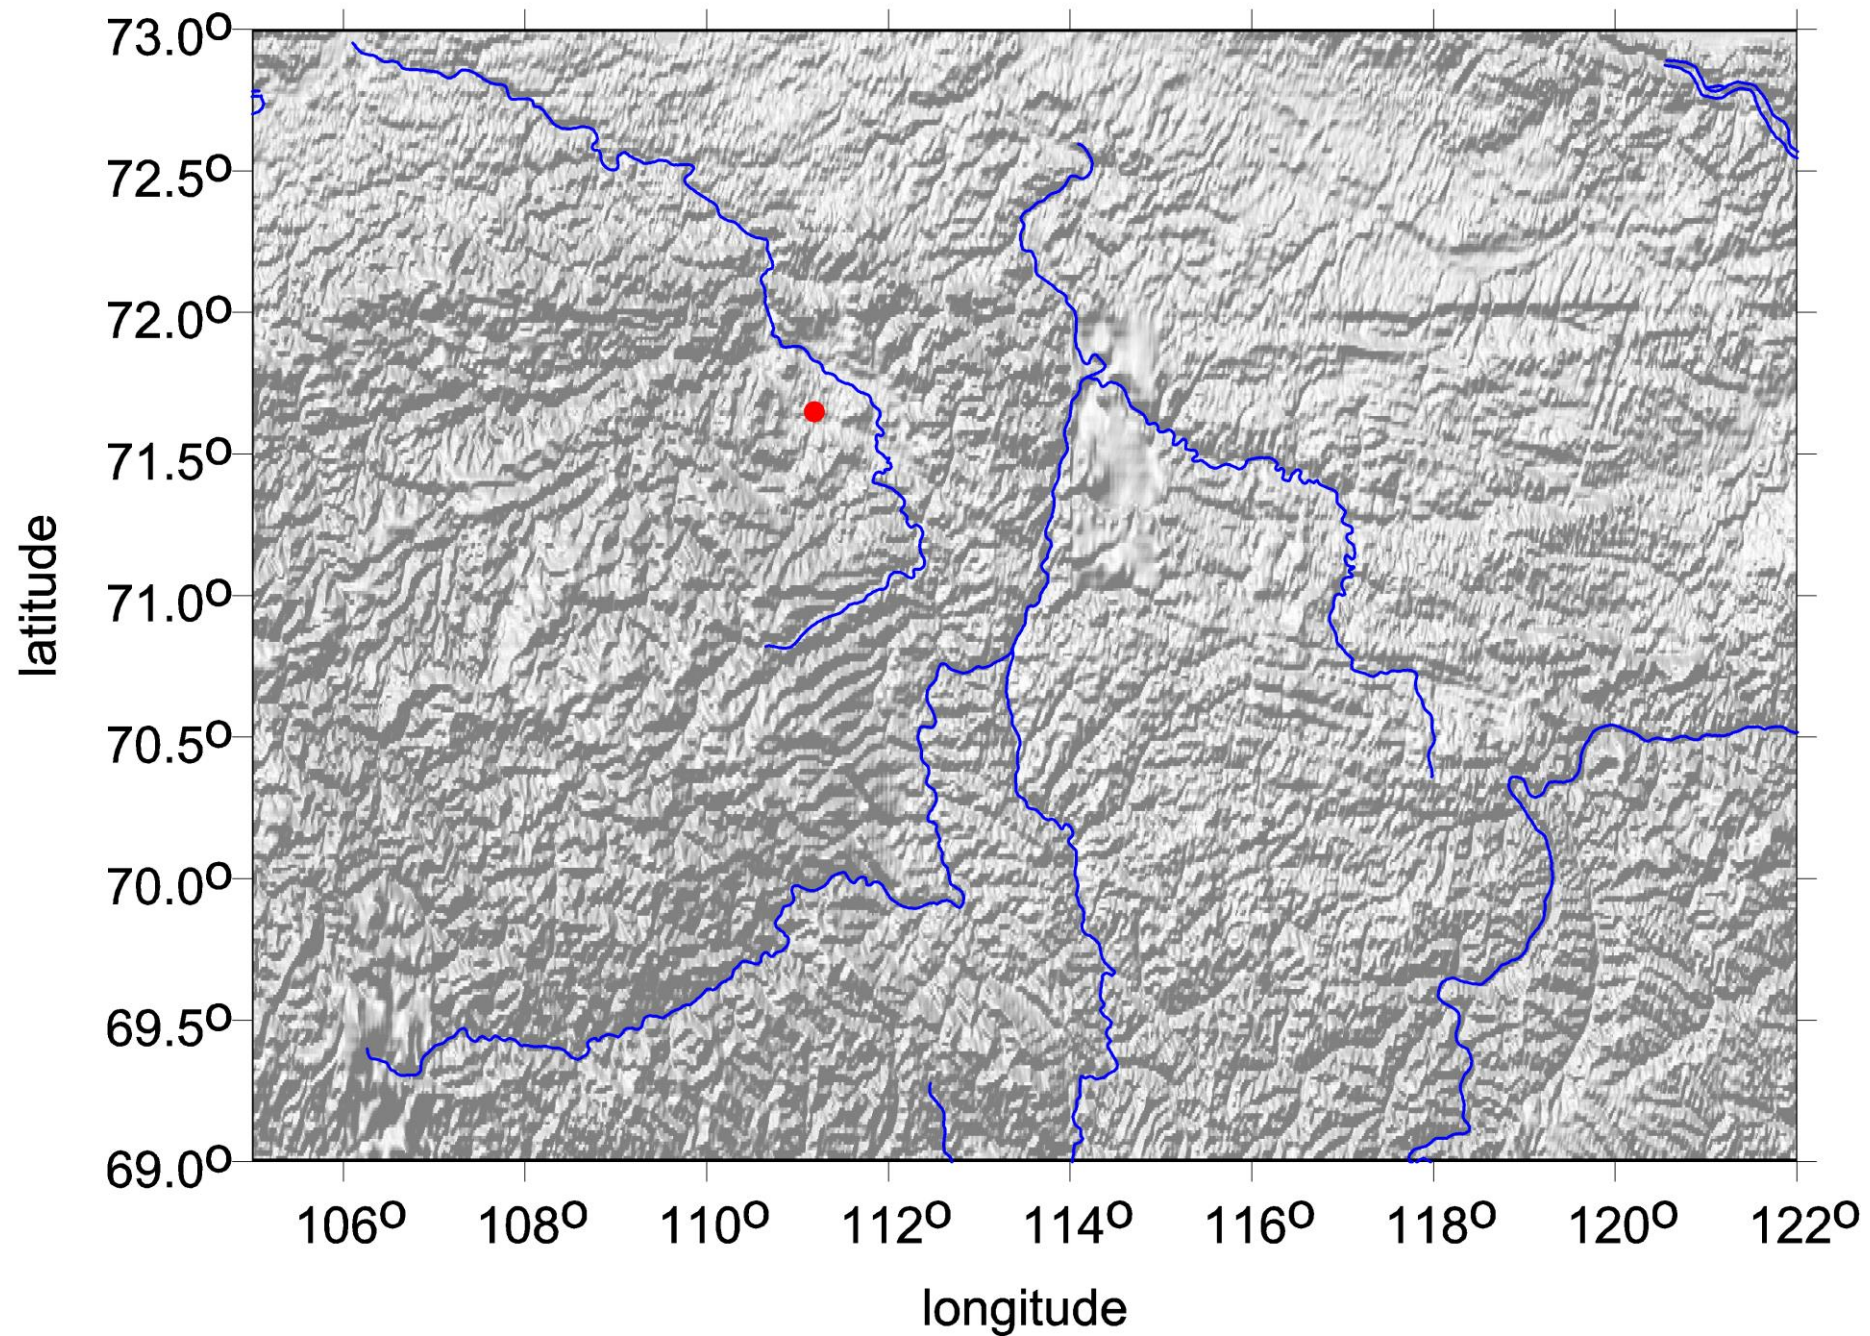

# Popigai family: gravity anomalies [mGal] and second radial derivative [E]

Eigen-6C4 - Popigai - delta g

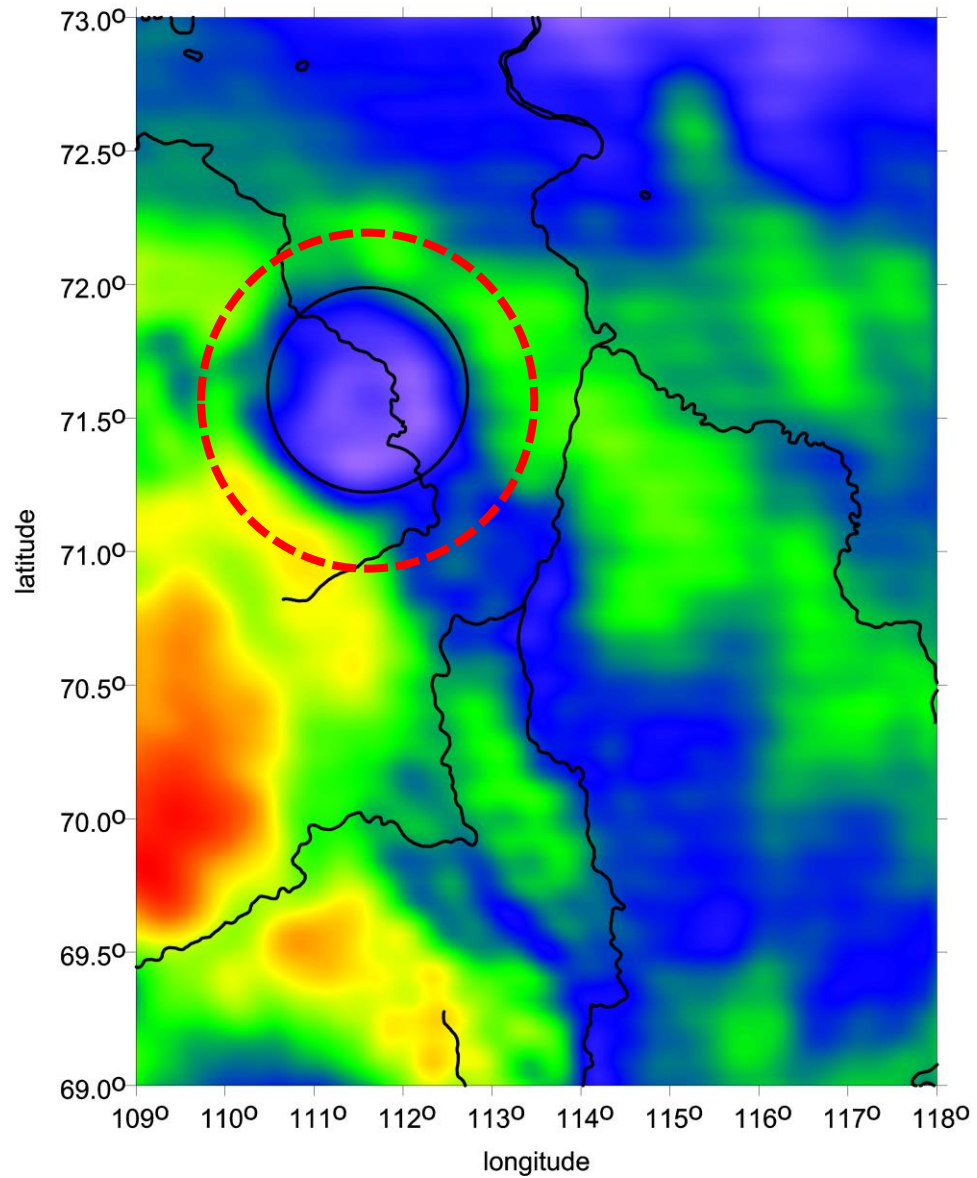

Eigen-6C4 - Popigai - Tzz

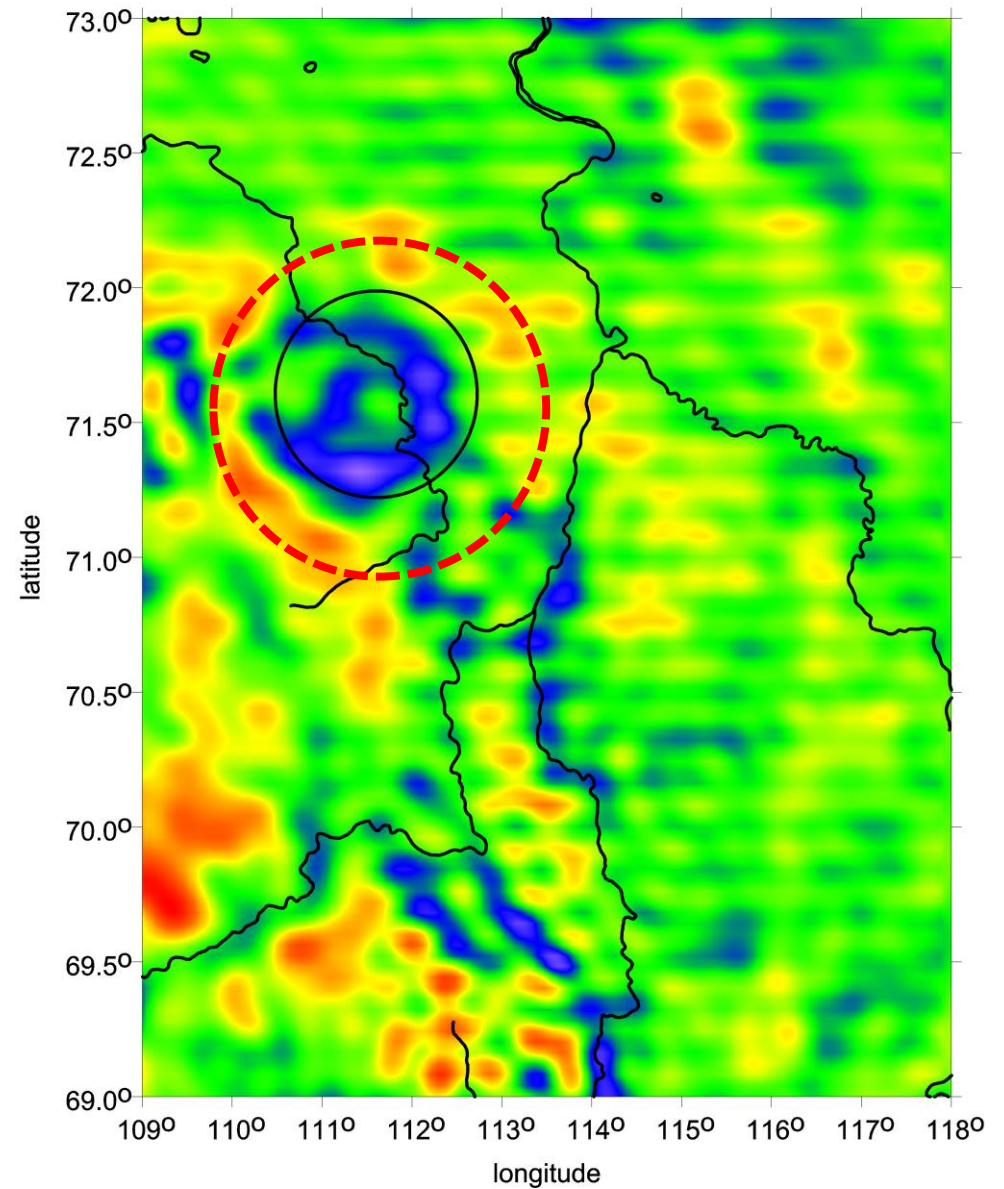

# Popigai family: the invariants $I_1$ [s-4] and $I_2$ [s-6]

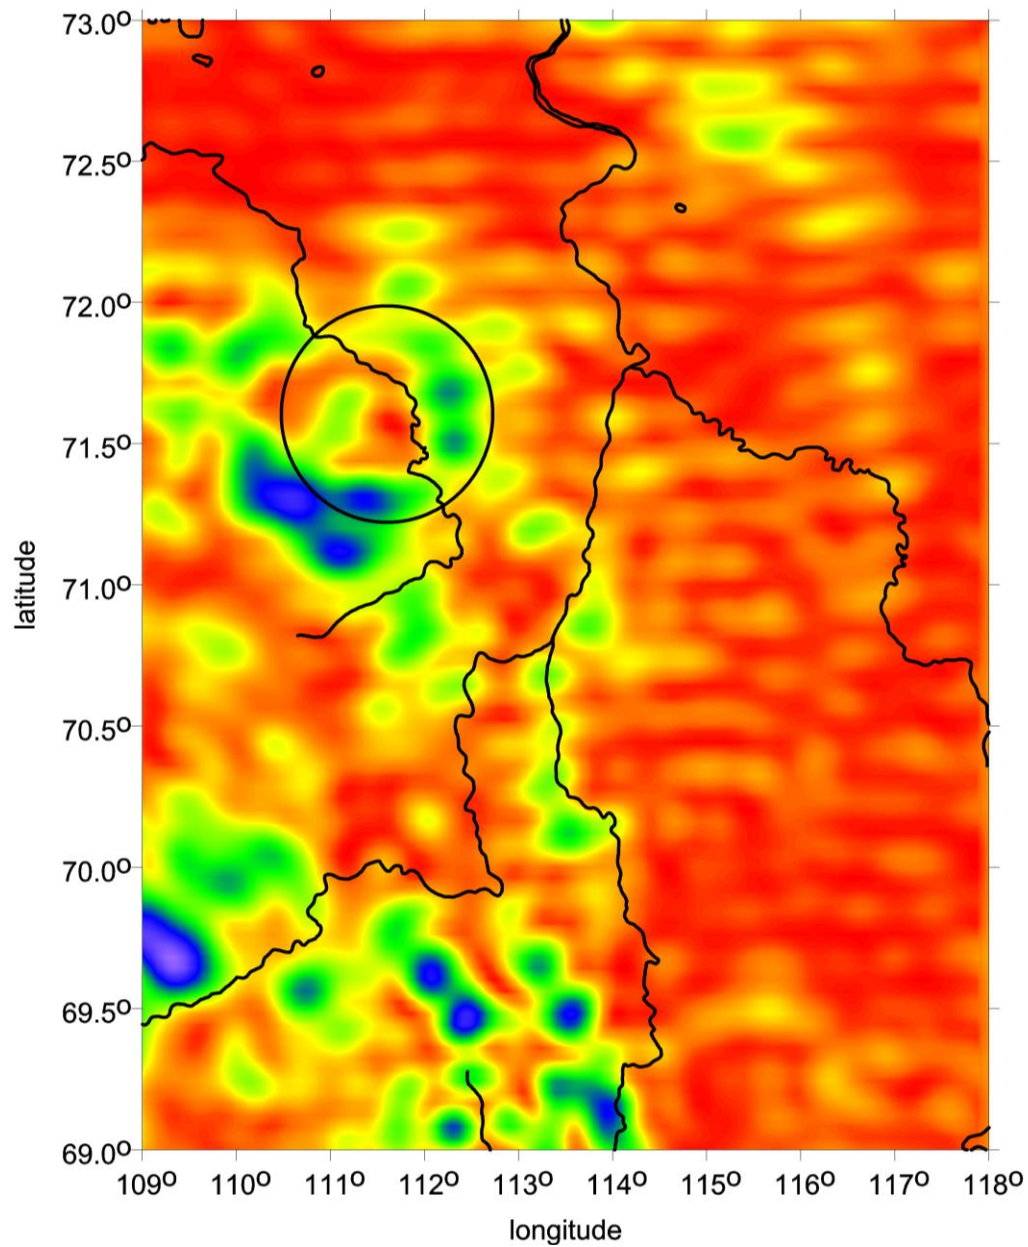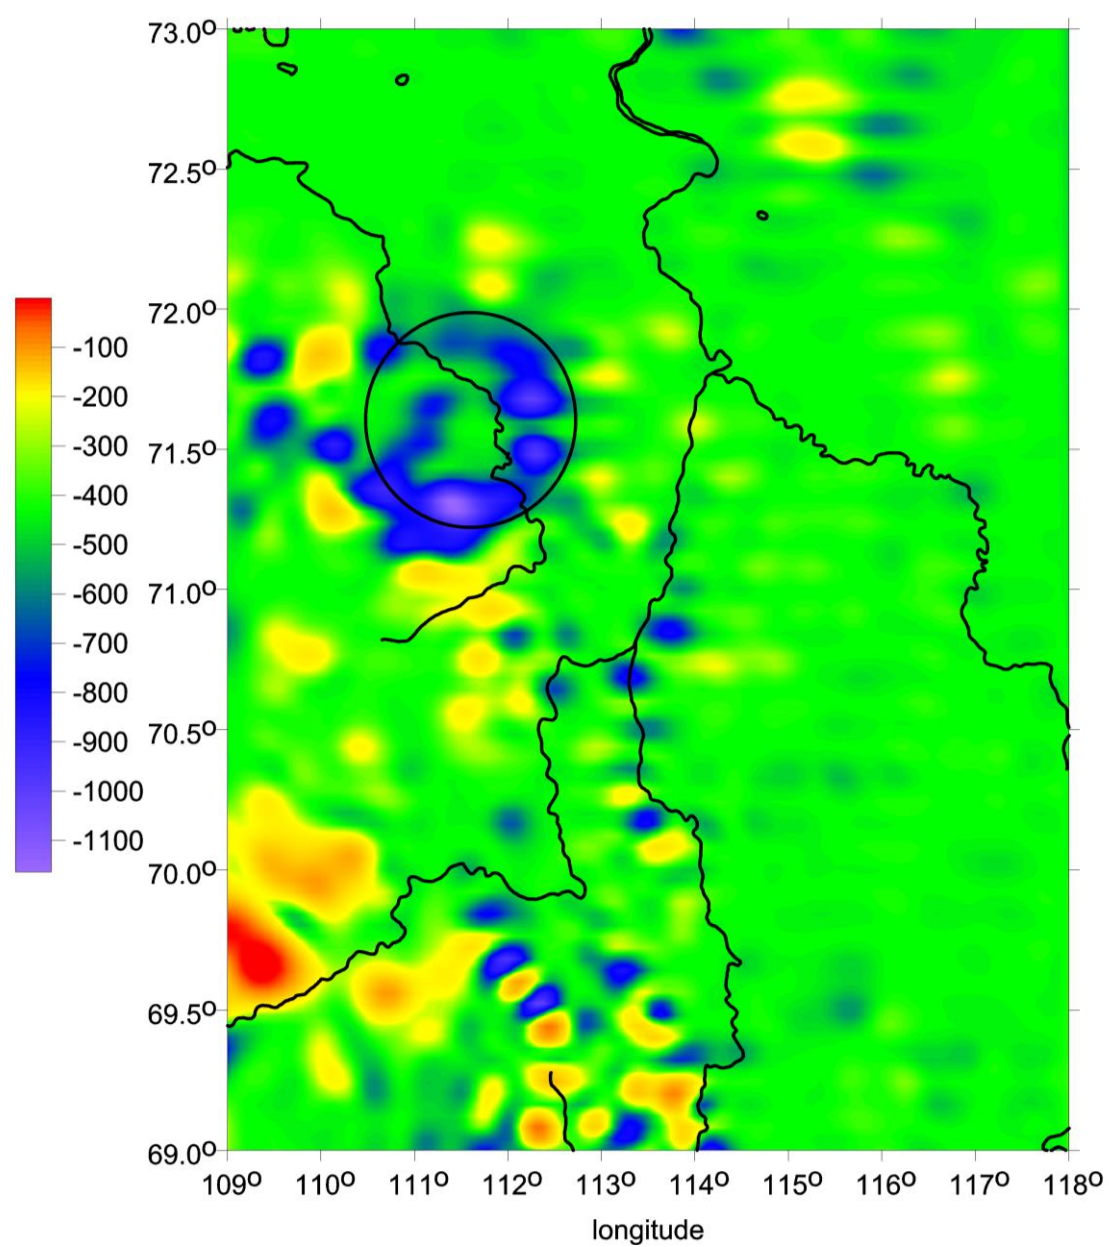

# Popigai family: the ratio $I$ of the invariants, strike angles [deg]

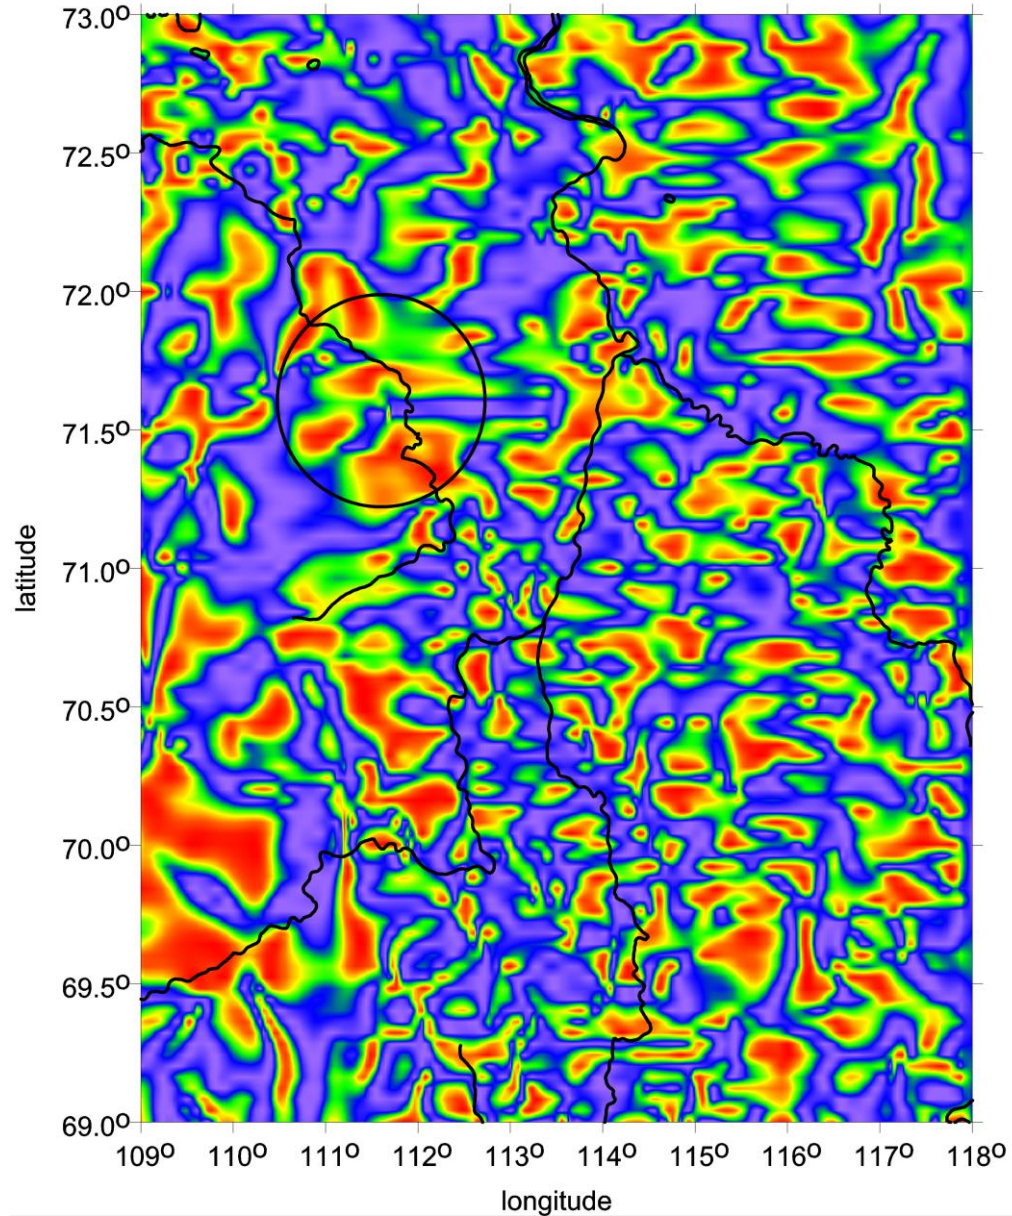

Eigen-6C4 - Popigai - Theta for RI < 0.9

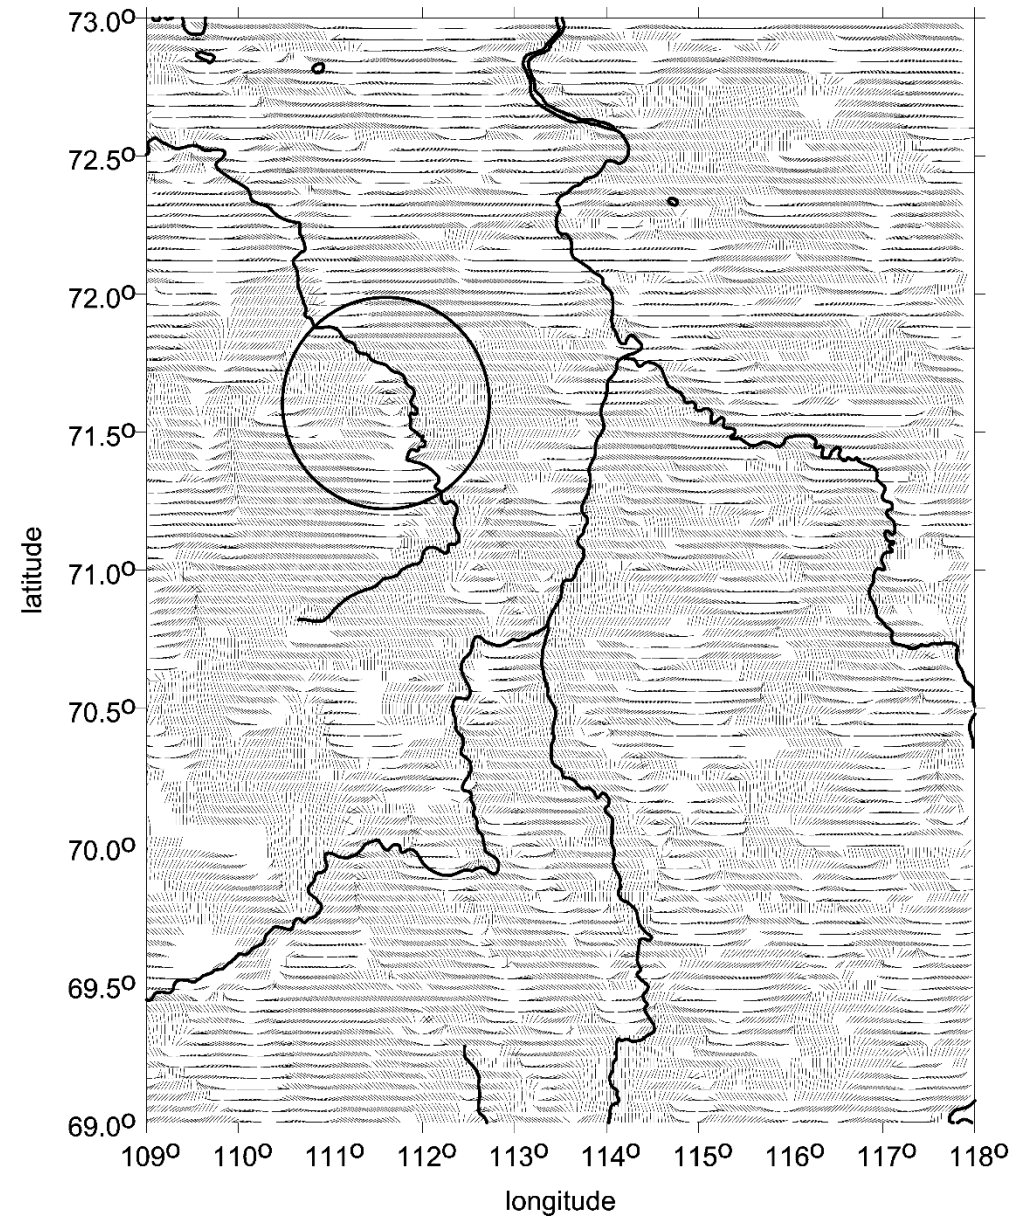



Eigen-6C4 - Popigai - virtual deformations

**Popigai family:**

virtual deformations [-]

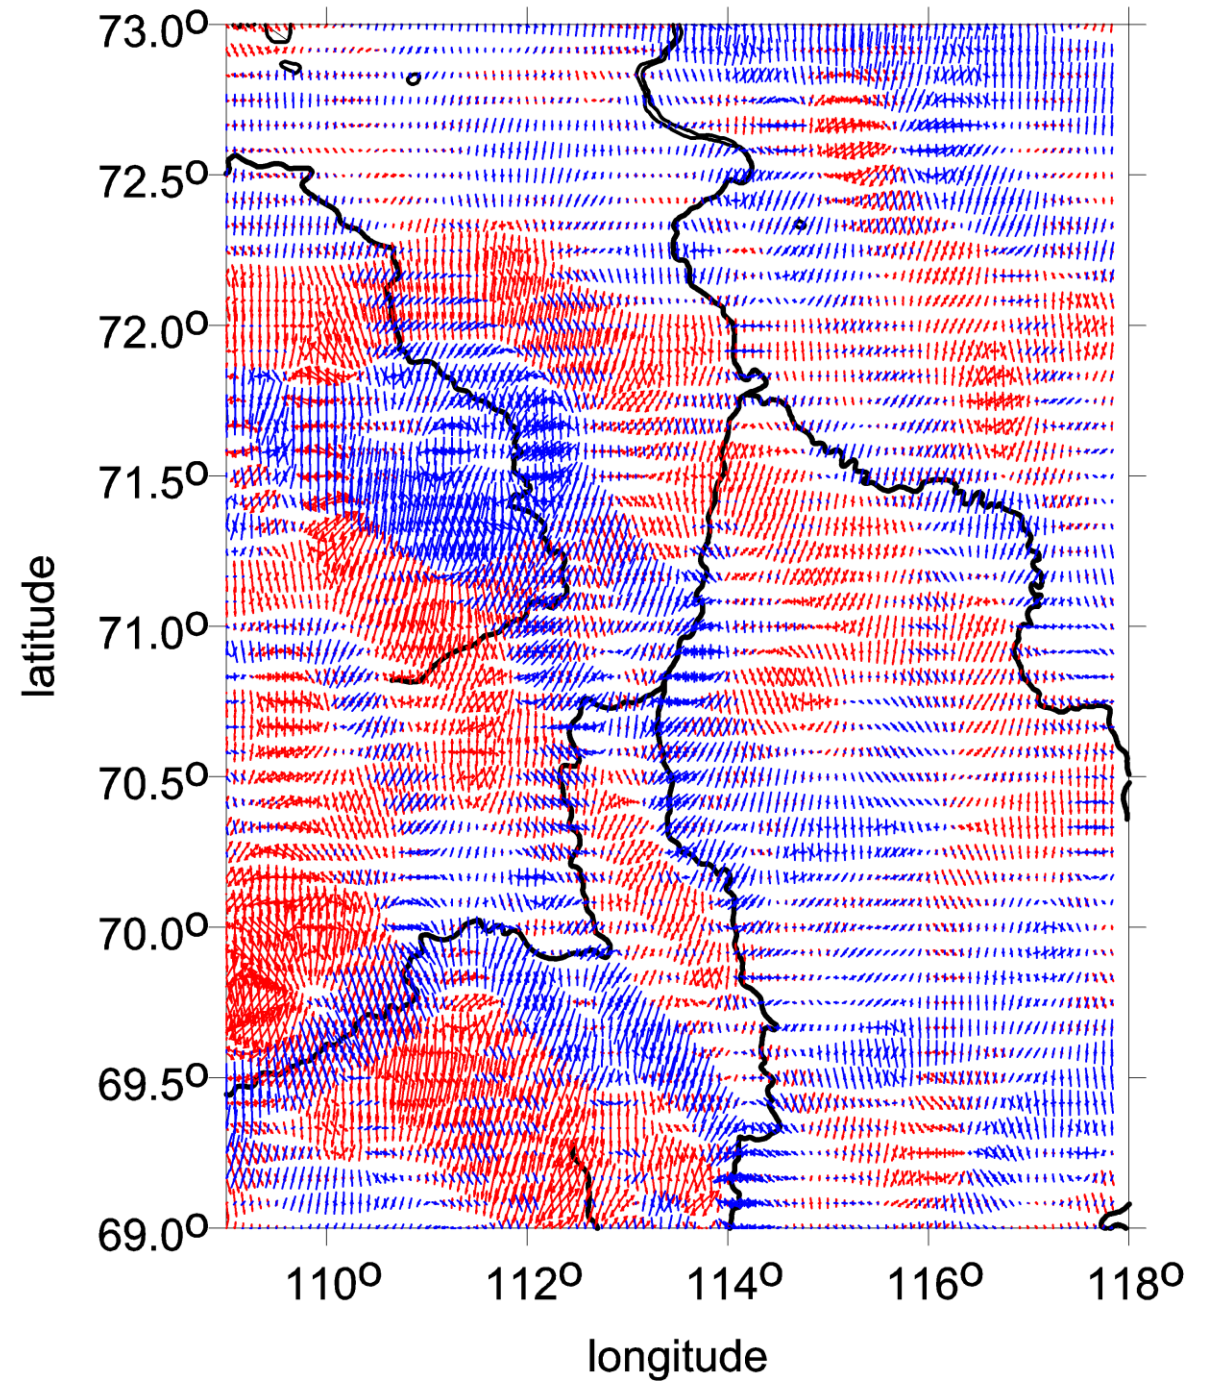

**Series of figures  
with the gravity aspects,  
combined with the strike angles  
and surface topography ETOPO 1  
(contour lines)**

Eigen-6C4 - Popigai - topo + delta g + theta for RI < 0.9

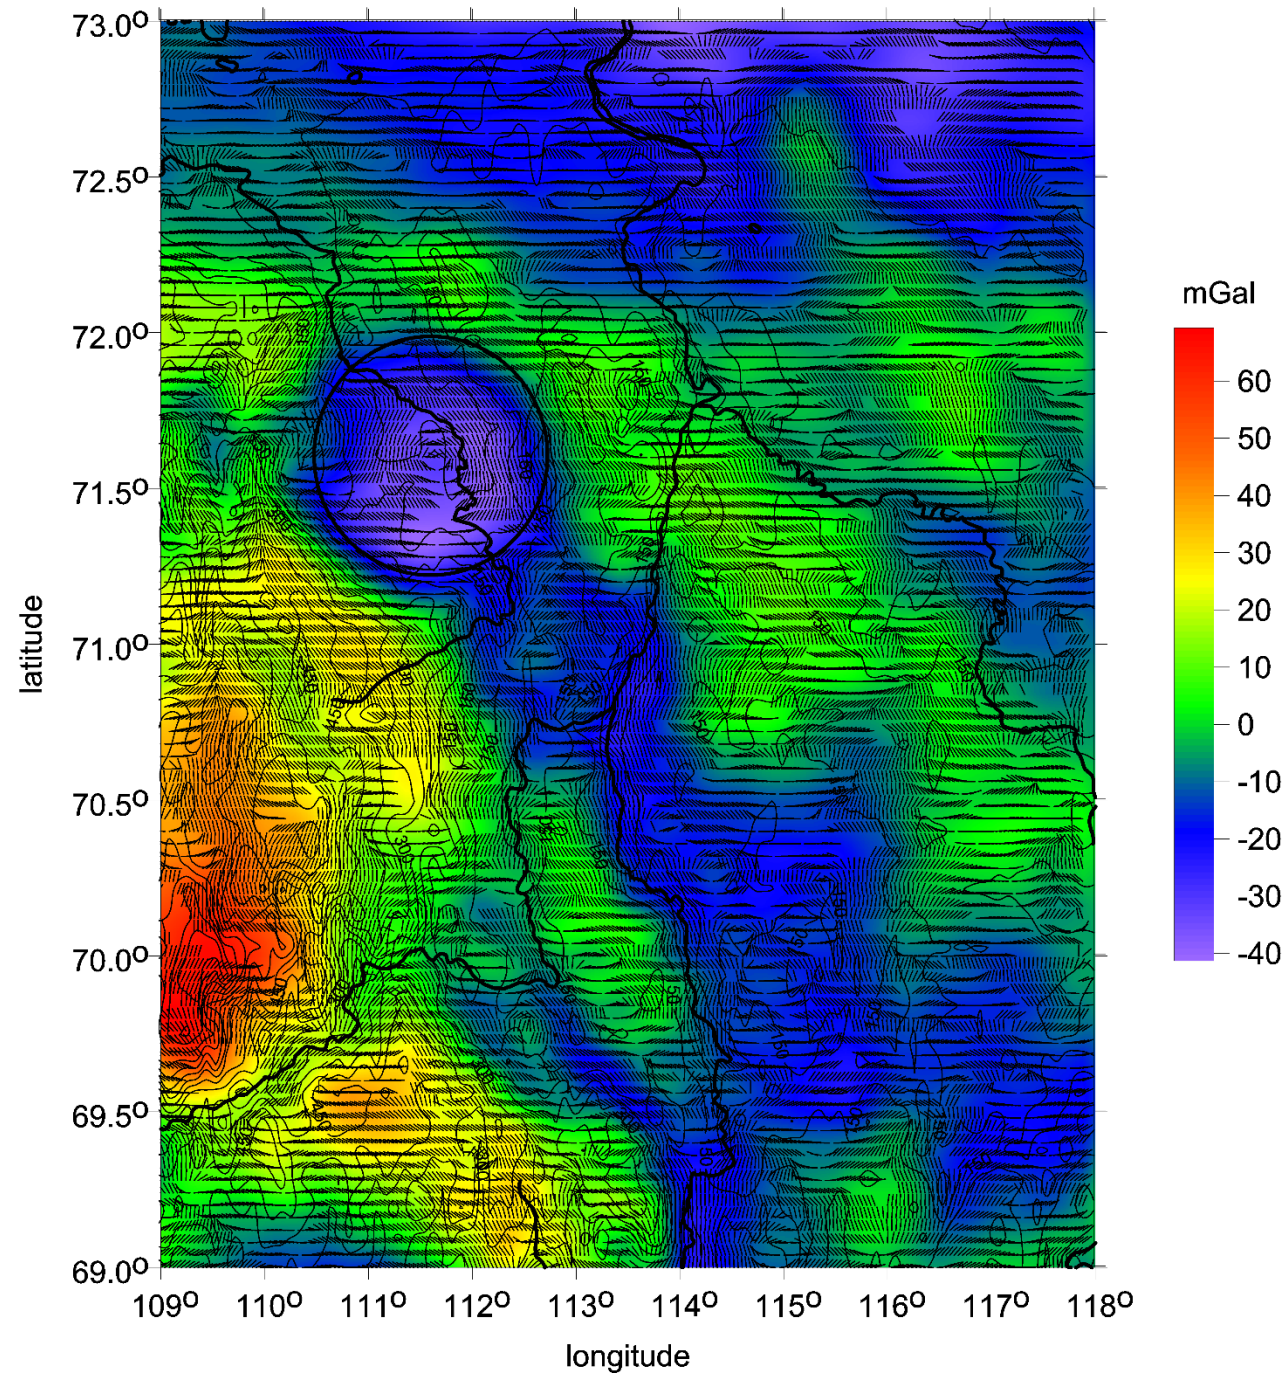

# Popigai family: gravity anomalies [mGal] and second radial derivative [E] together with the strike angles [deg]

Eigen-6C4 - Popigai - delta g + Theta for RI < 0.9

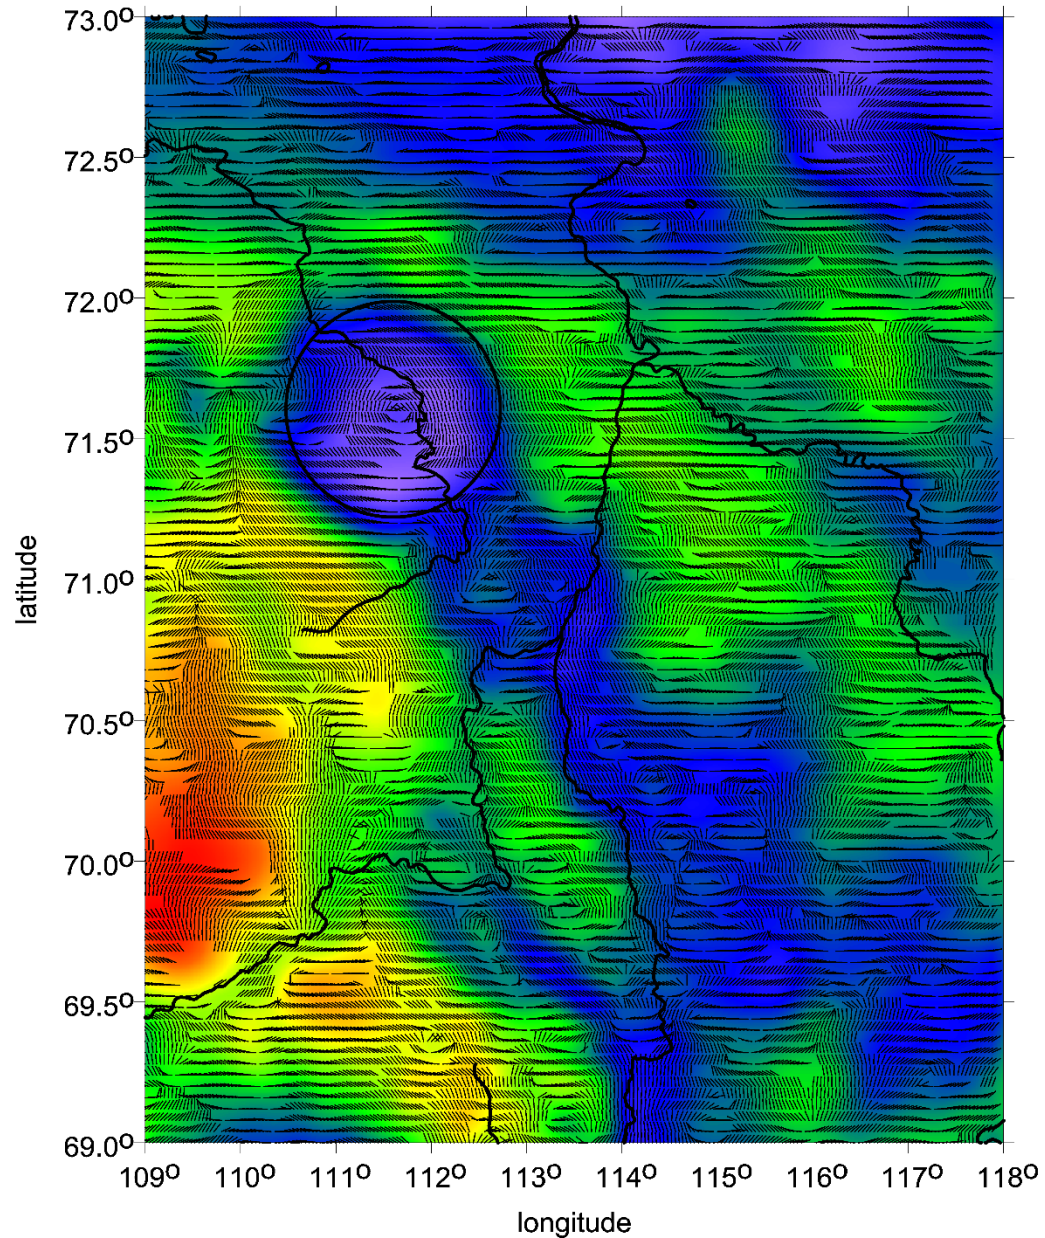

Eigen-6C4 - Popigai - Tzz + Theta for RI < 0.9

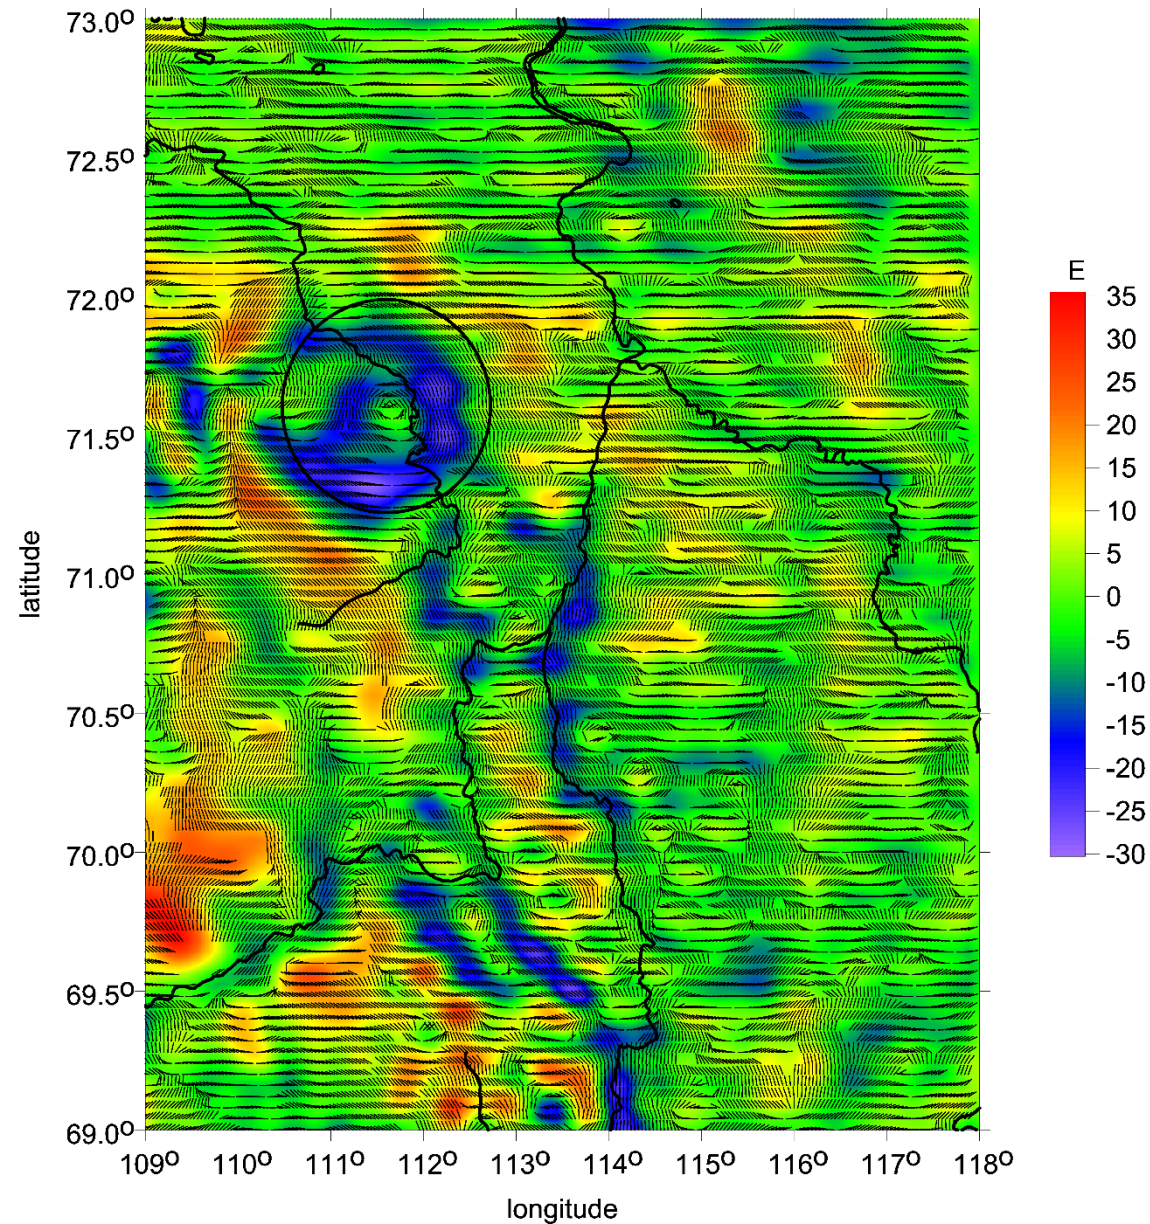

Eigen-6C4 - Popigai - topo + Tzz + theta for RI &lt; 0.9

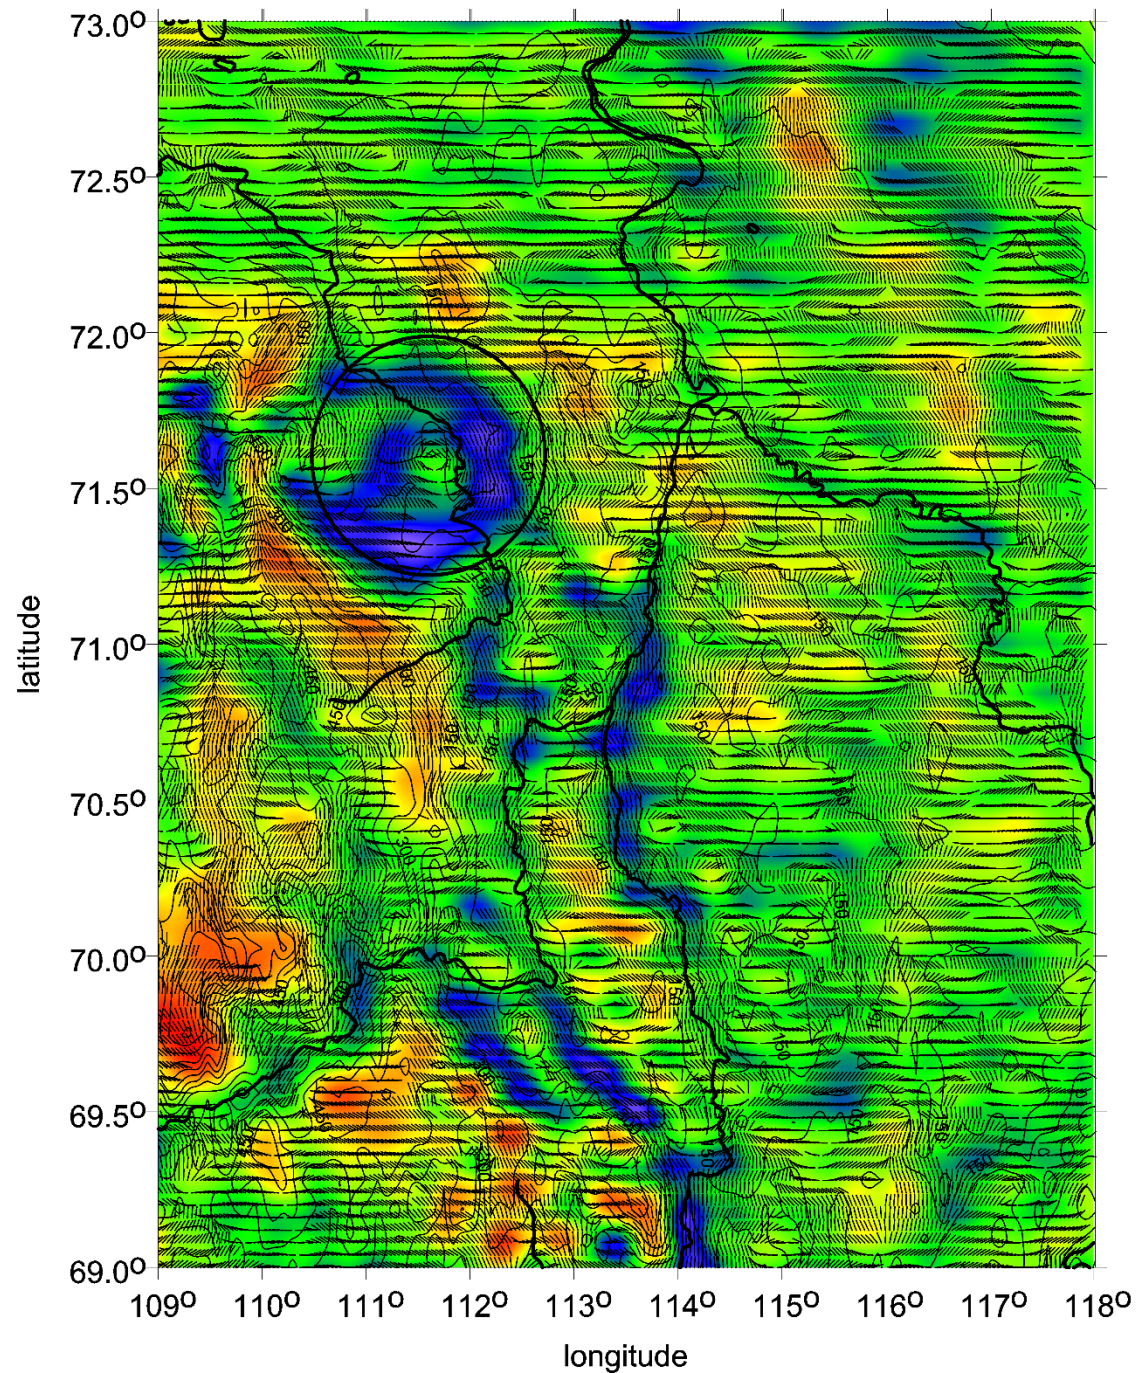

Eigen-6C4 - Popigai - topo + Tzz

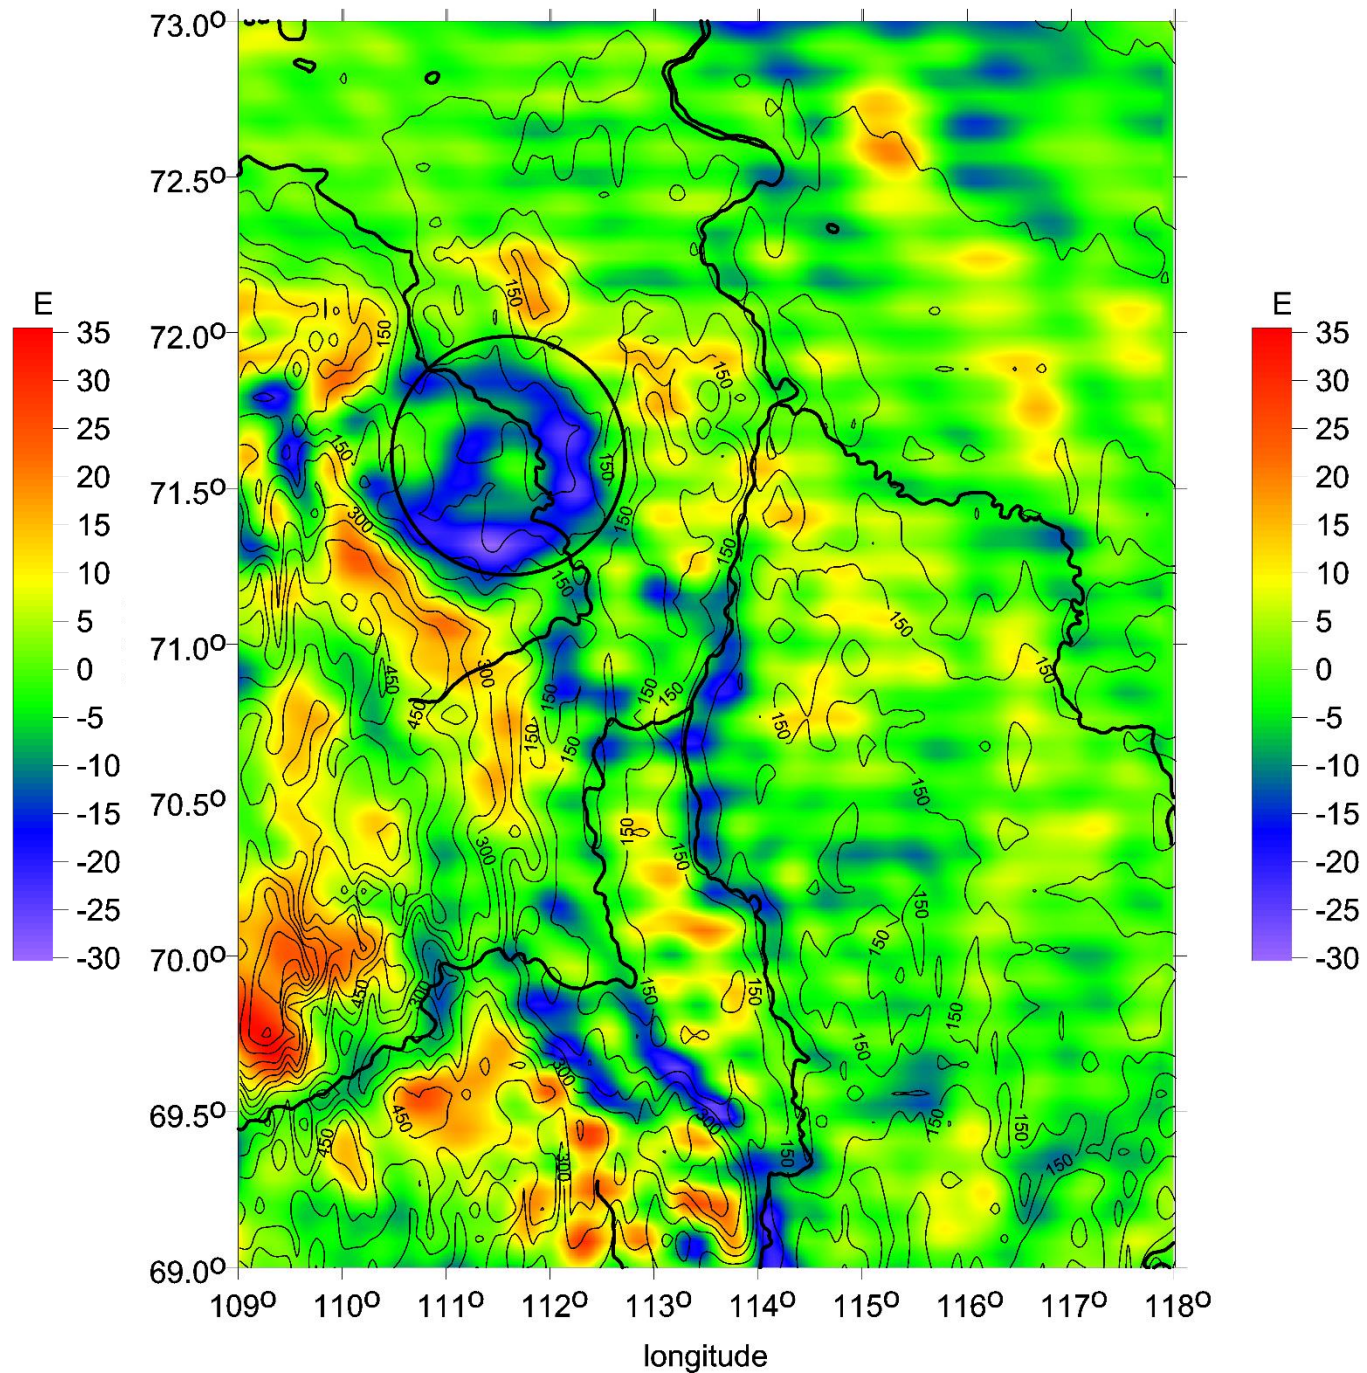

Eigen 6C4 - Popigai - topo + Txx

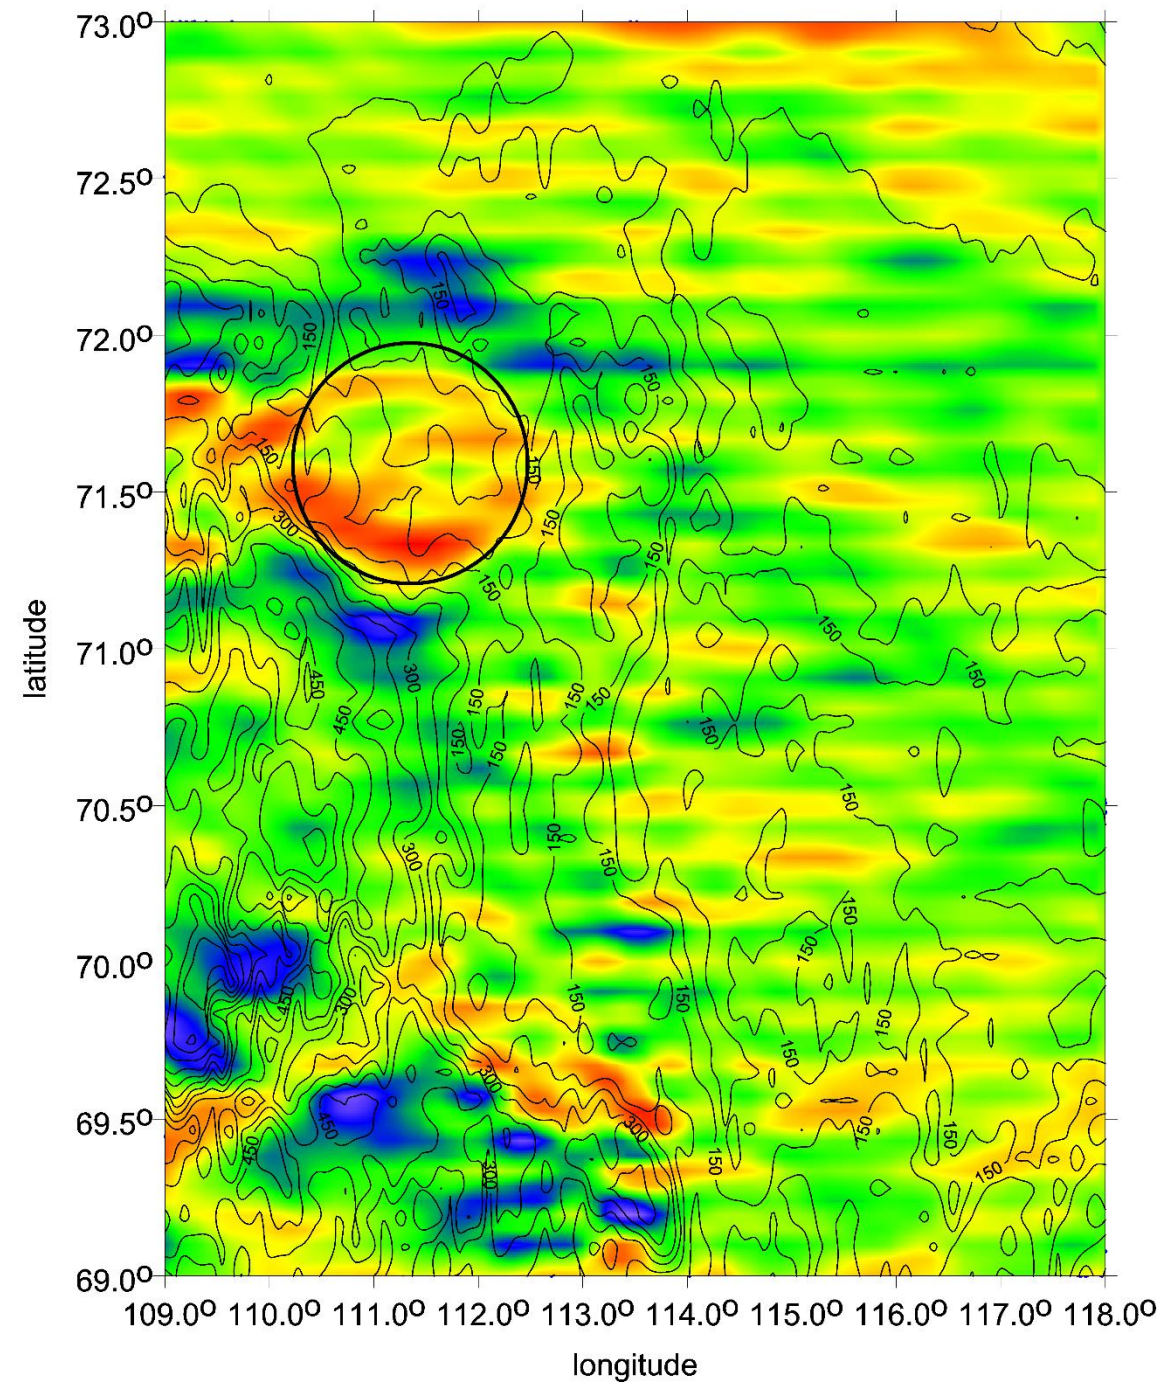

Eigen-6C4 - Popigai - topo + Tyy

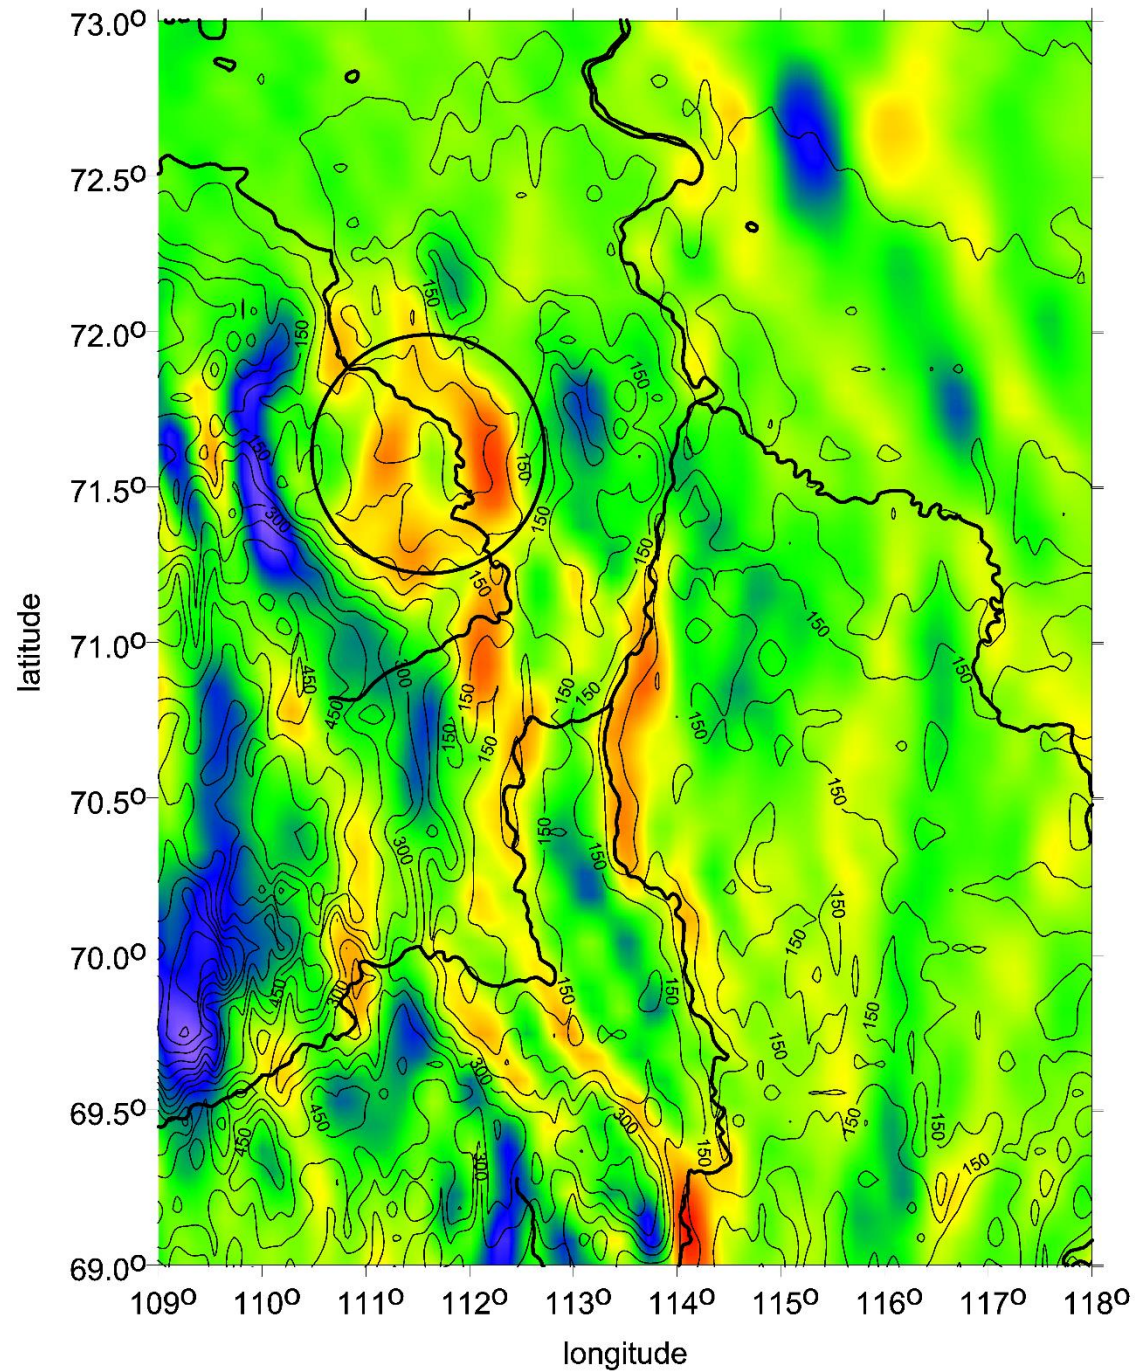

Eigen-6C4 - Popigai - topo + RI2

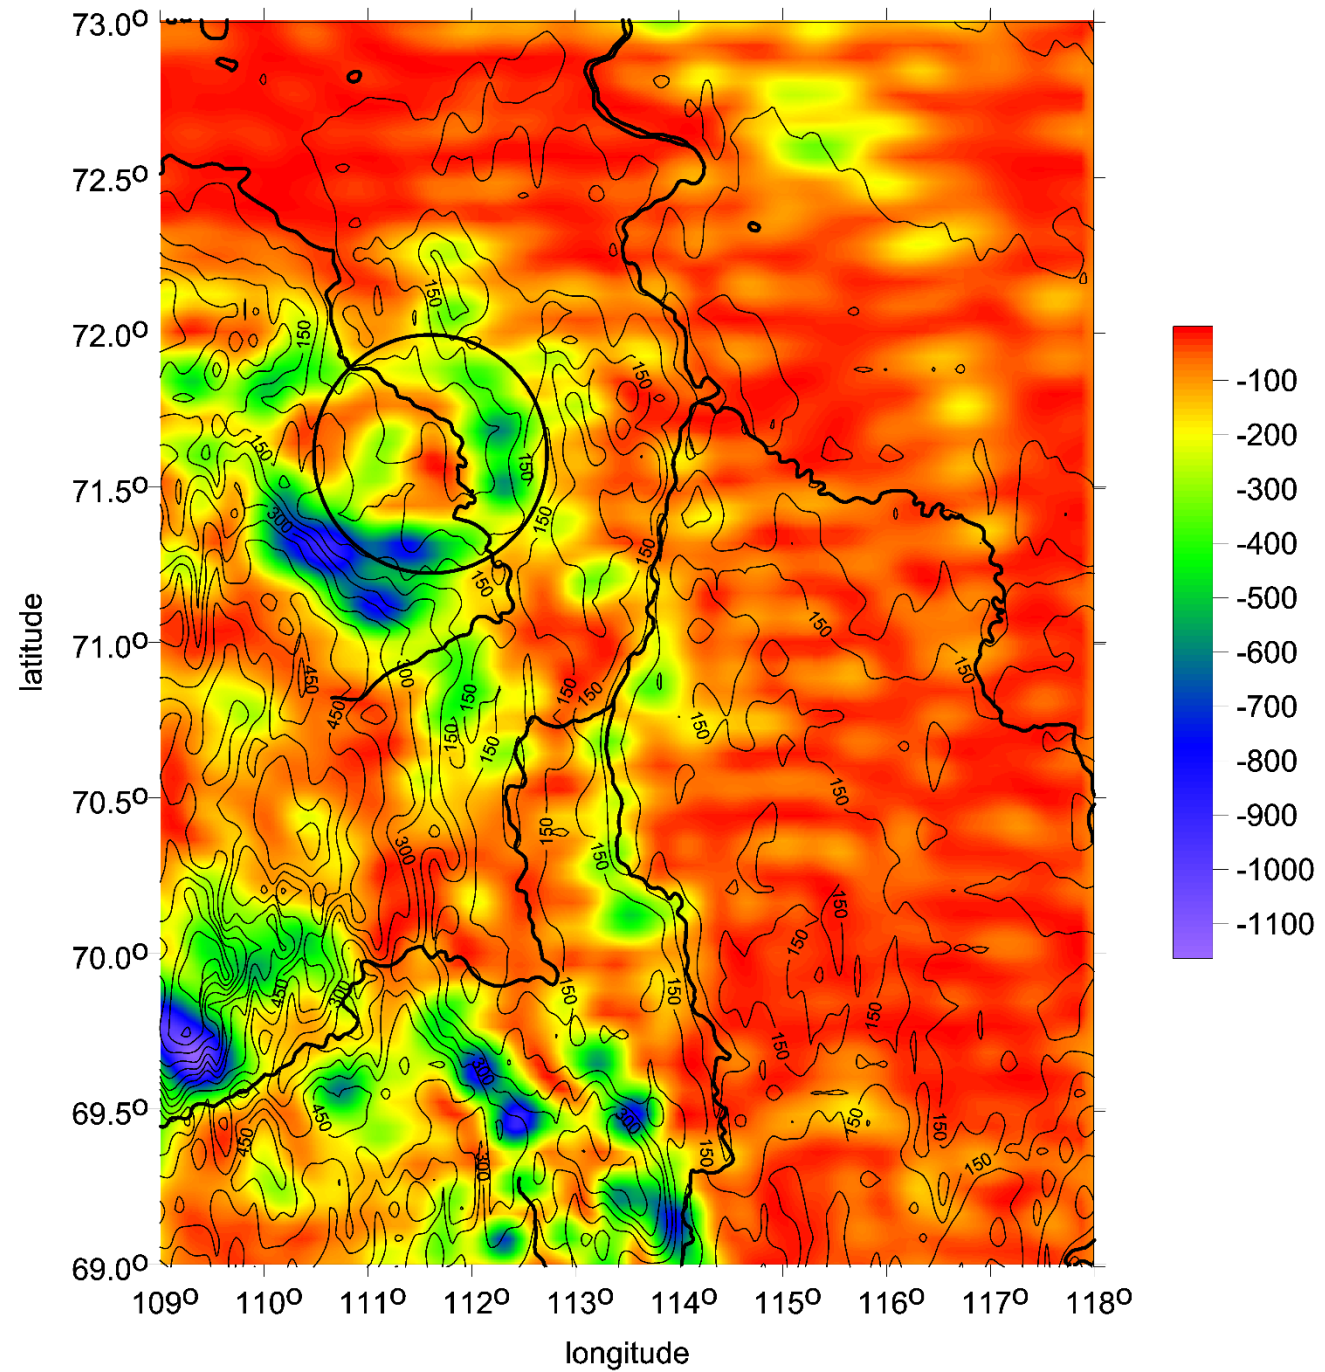



Eigen-6C4 - Popigai - topo + RI3

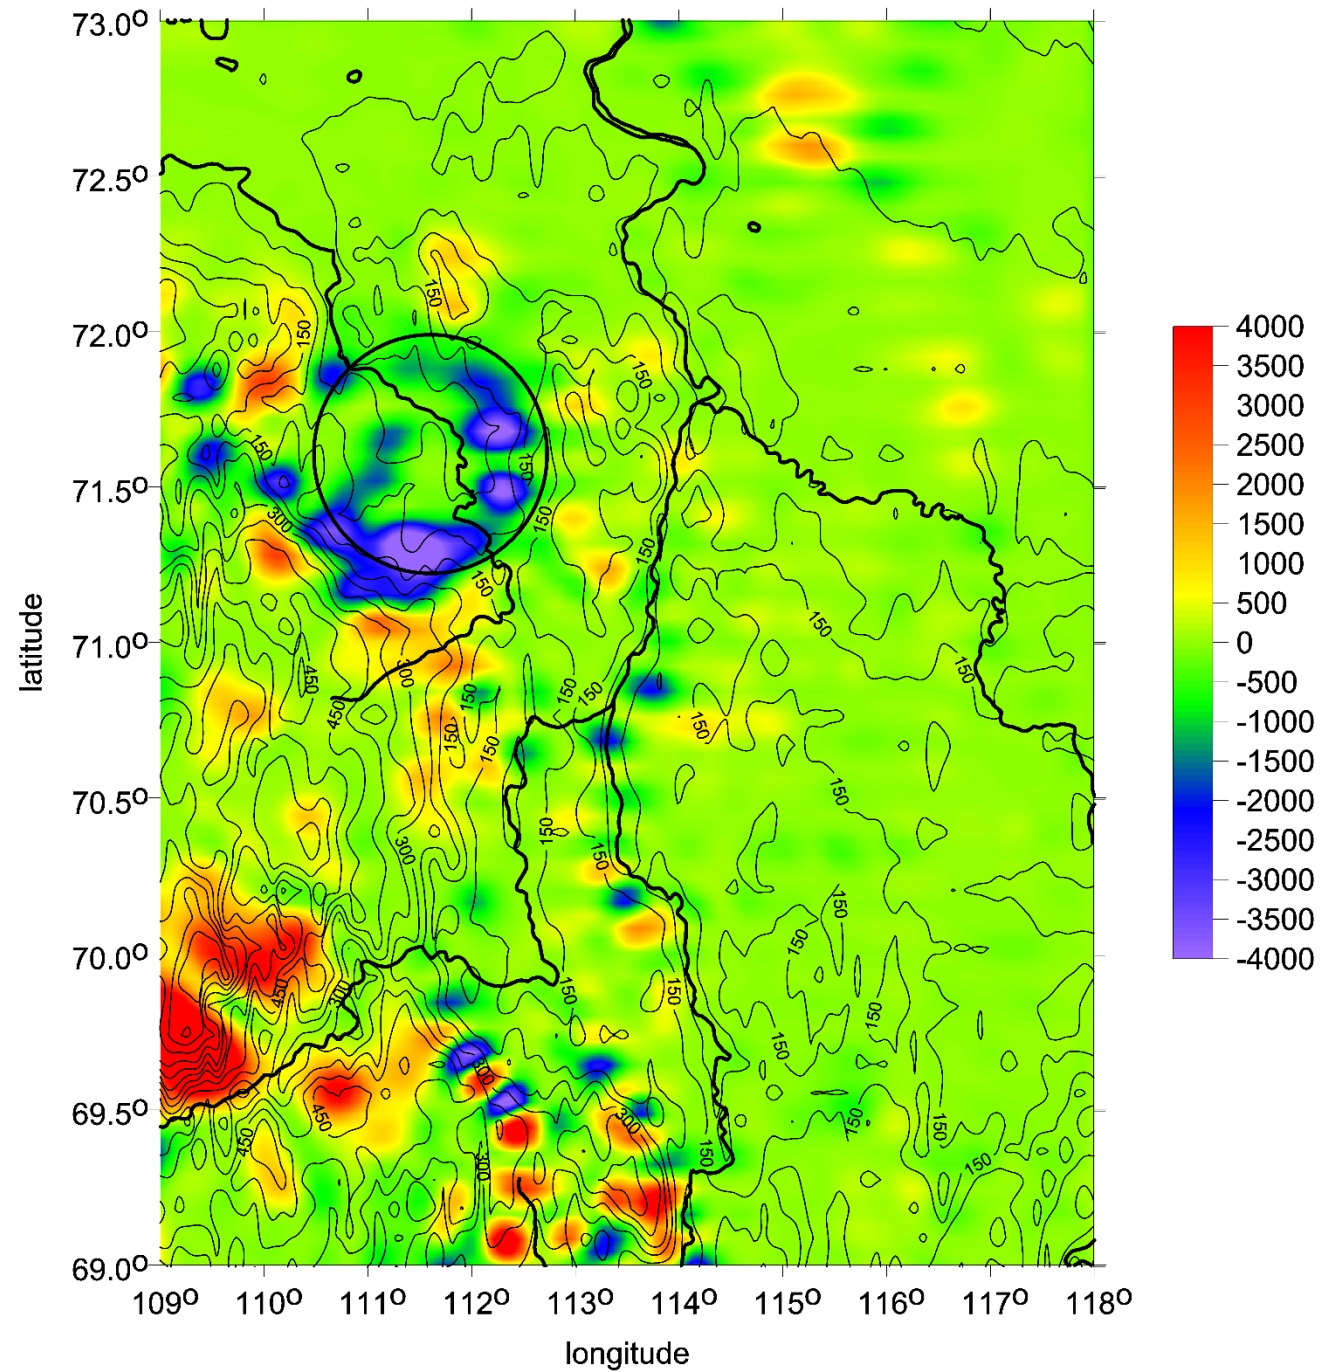

Eigen-6C4 - Popigai - topo + RI

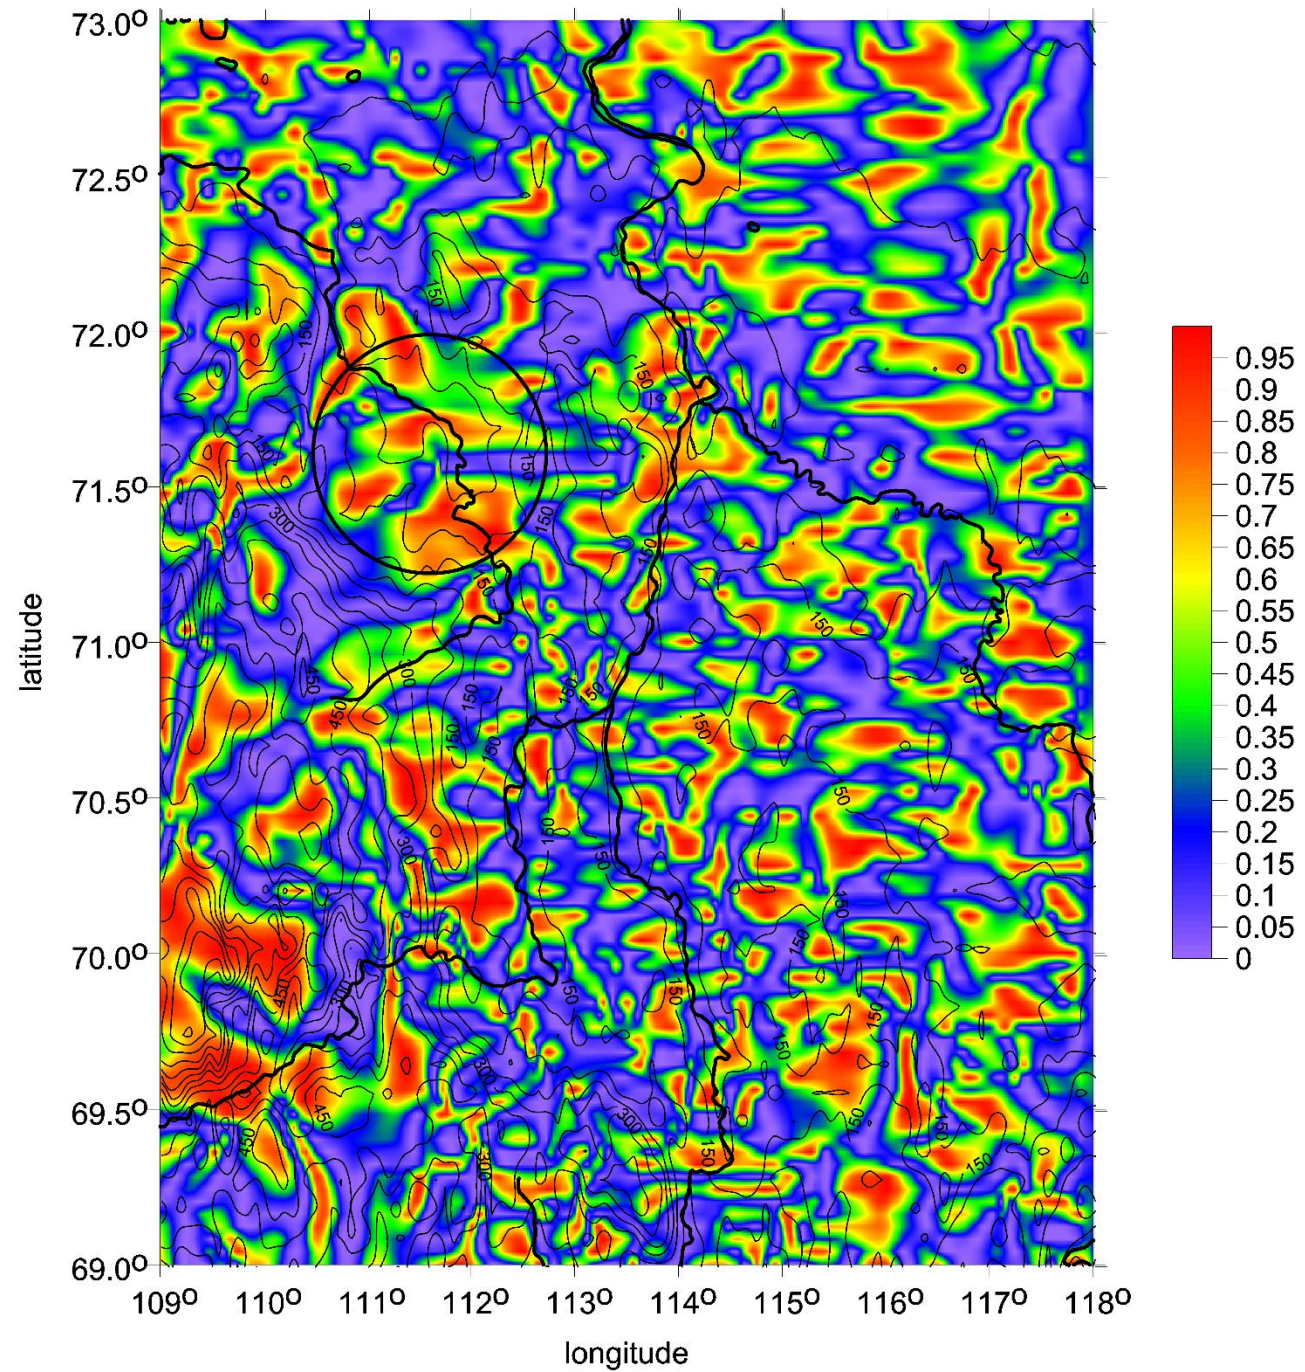

Eigen 6C4 - Popigai - Theta for RI &lt; 0.9

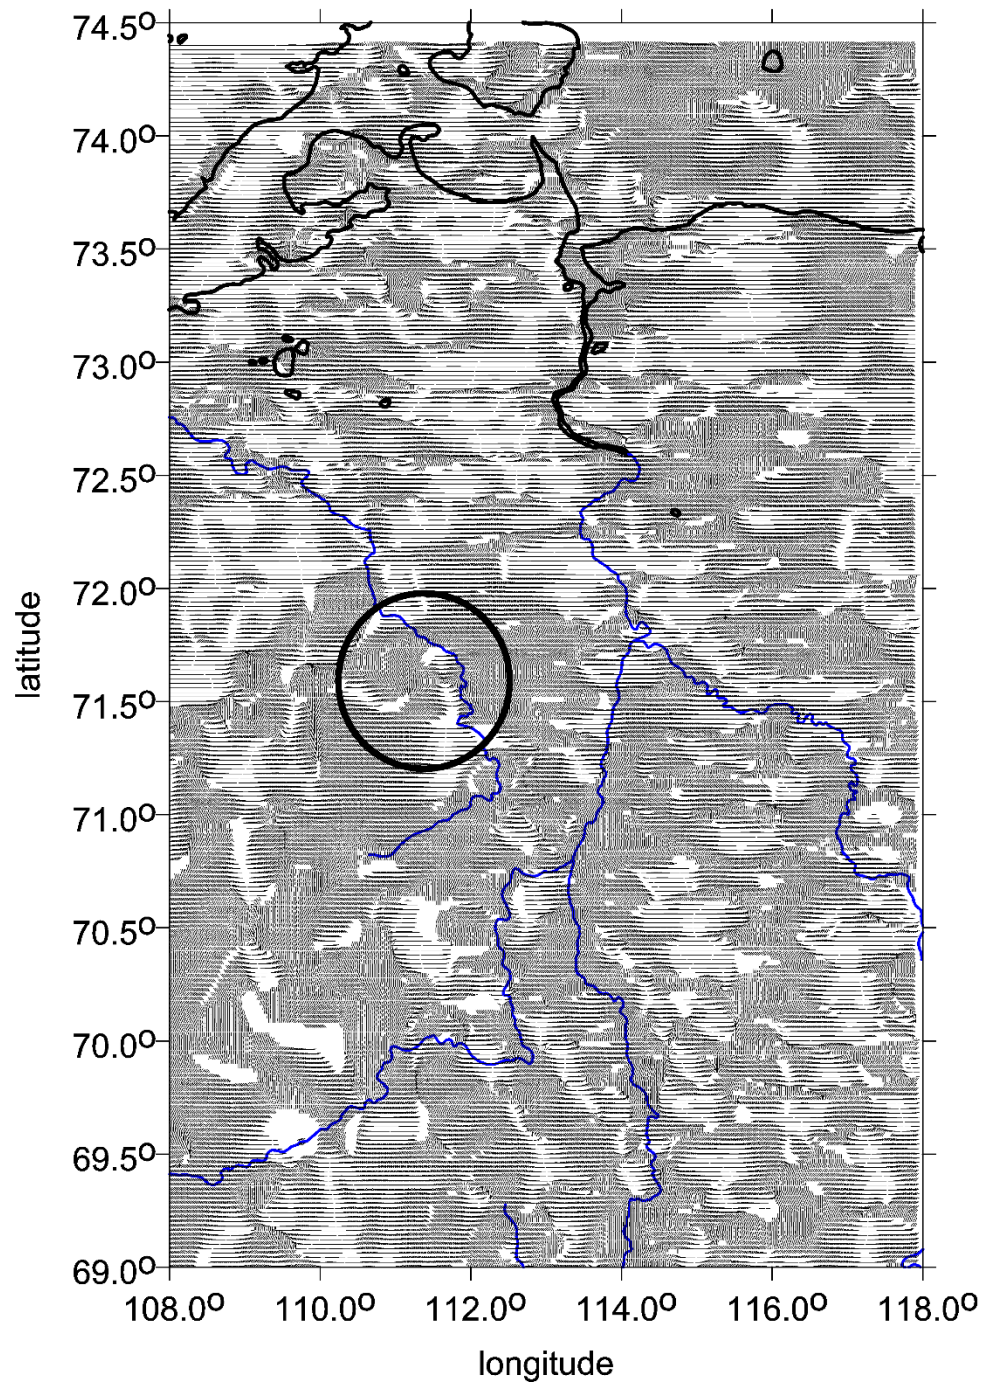

Eigen 6C4 - Popigai - Theta for RI &lt; 0.9 + comb

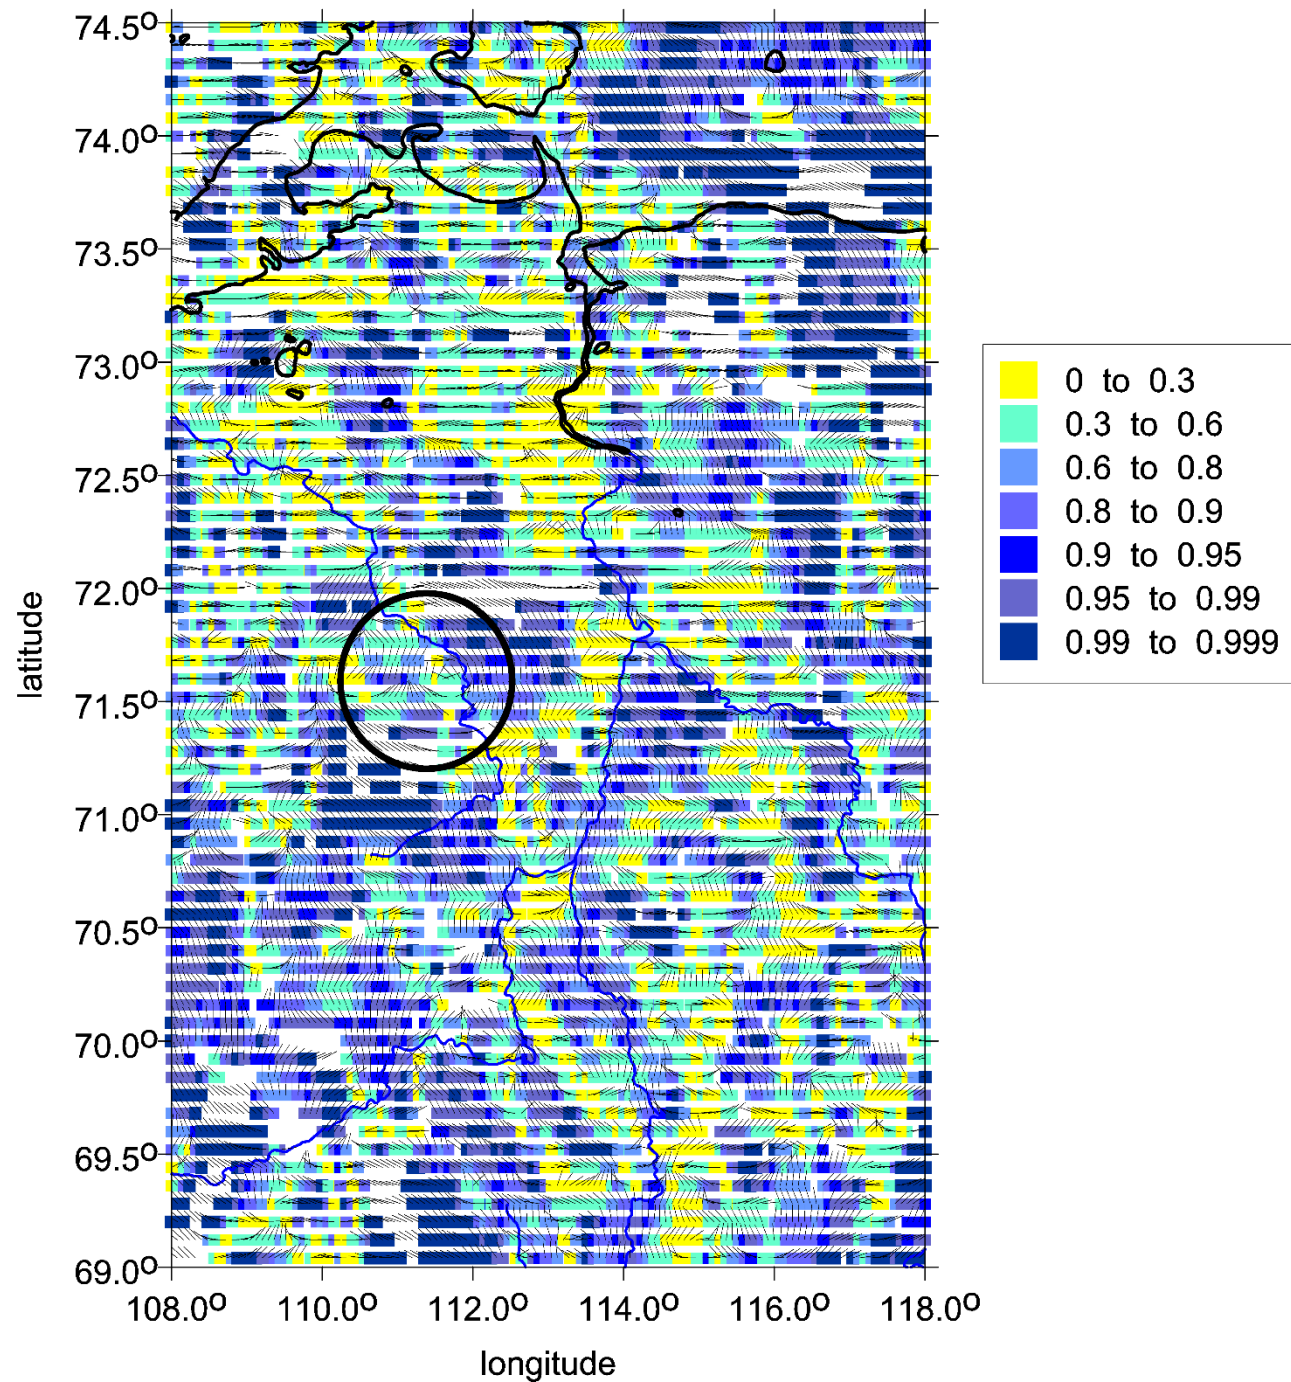

# Popigai main crater:

zoom with  
the strike angles [deg]

Popigai/Daldyn river (in blue colour)  
flowing thru the crater  
exposes the impact features

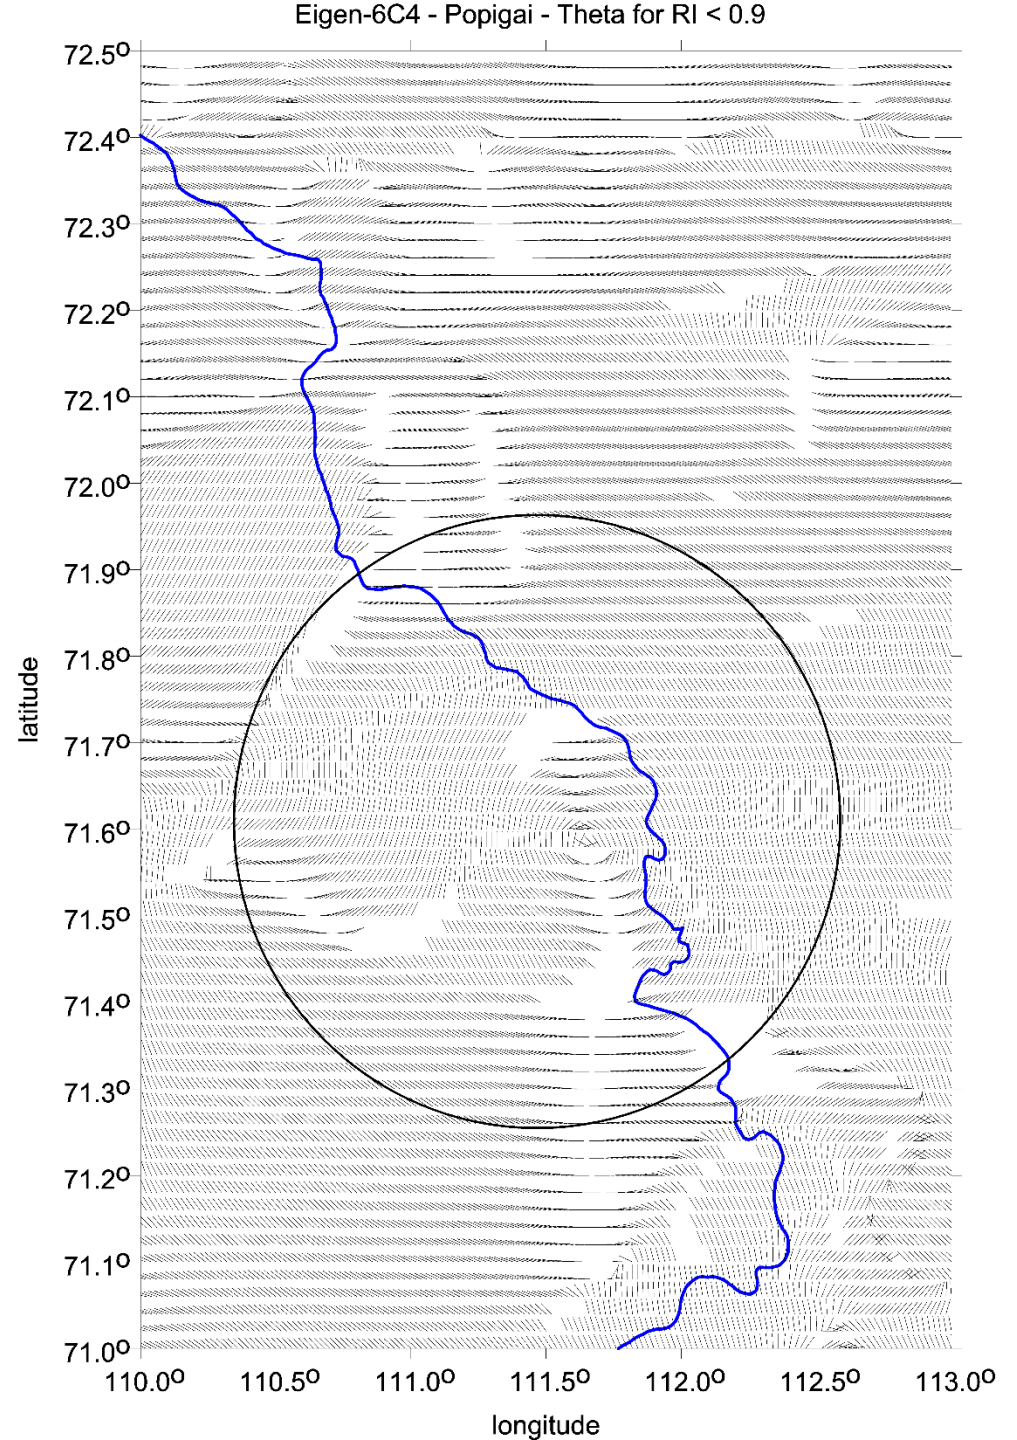

Eigen 6C4 - Popigai - south - dg + Theta for RI < 0.9 (4 km)

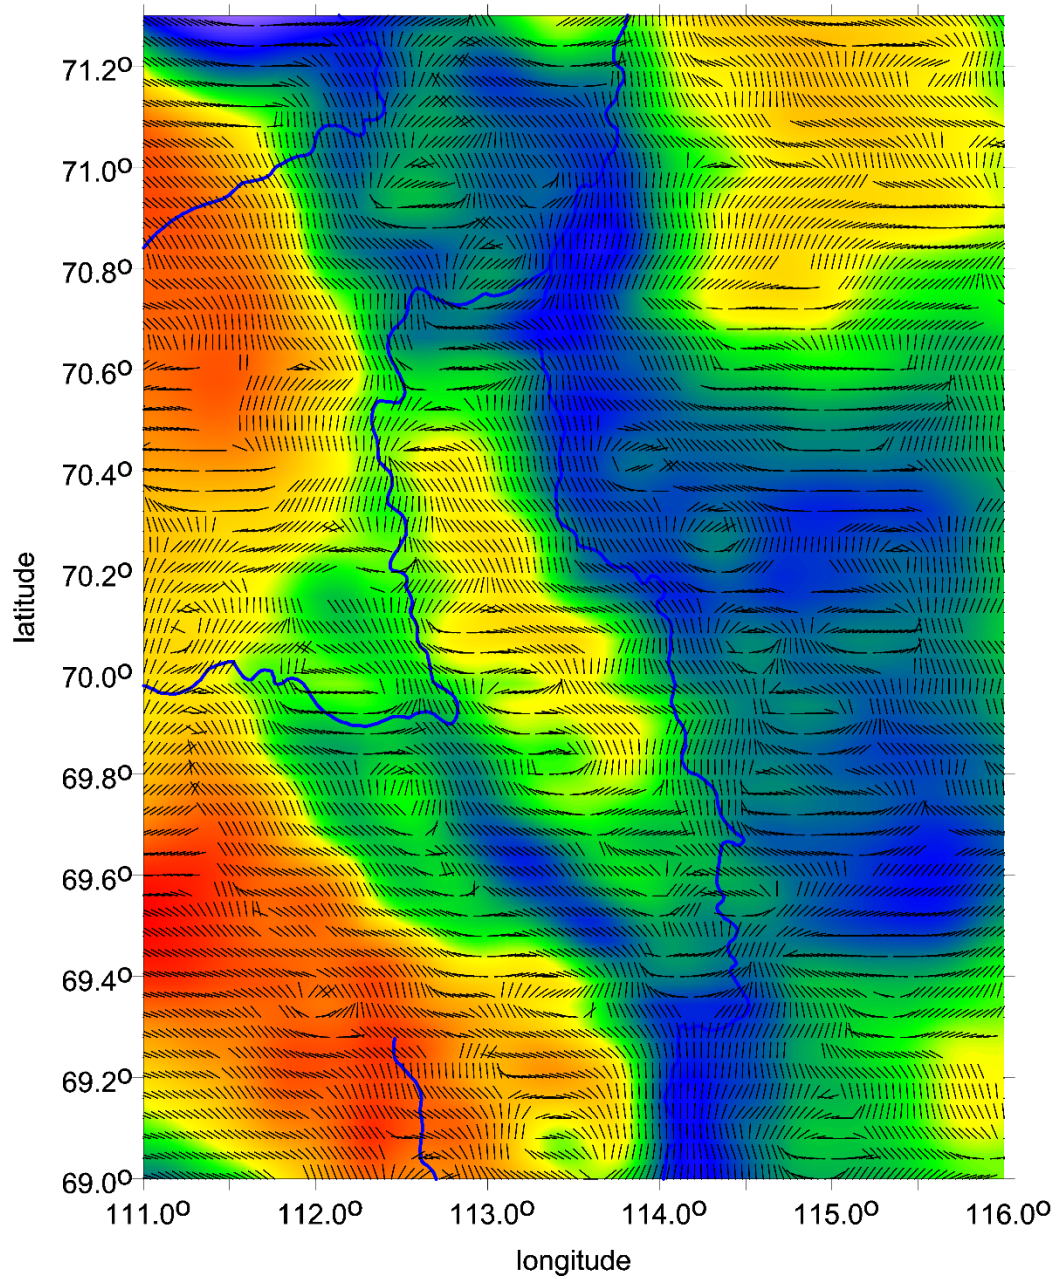

# Popigai family

SE part  
strike angles  
[deg]

mGal

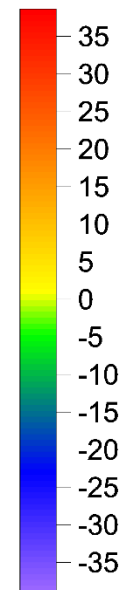

Eigen 6C4 - Popigai - south - Theta for RI < 0.9 (4 km)

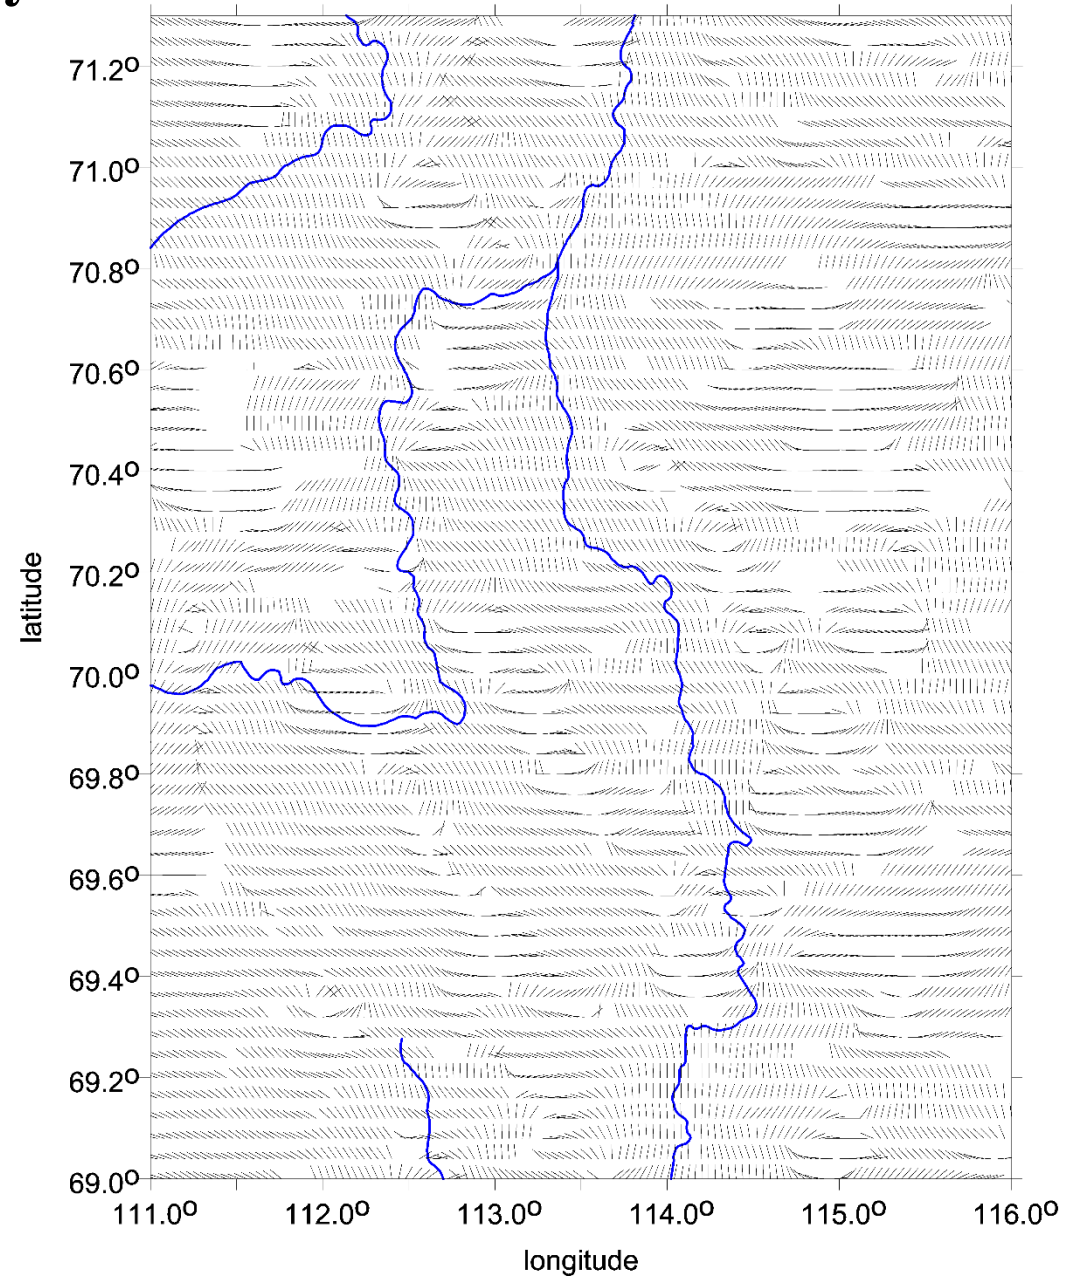

# Kotuyakanskaya series, Siberia

## near Popigai family

ETOPO 1 topography [m]

### References:

- Klokočník J, Kostelecký J, Bezděk A, Kletetschka G, Staňková H, 2020. A 200 km suspected impact crater Kotuyakanskaya near Popigai, Siberia, in the light of new gravity aspects from EIGEN 6C4, and other data. *Scientific Reports (Nature)* 10, 6093. <https://doi.org/10.1038/s41598-020-62998-6>.  
*Presentace:*  
Klokočník J, Kostelecký J, Bezděk A, Kletetschka G, Staňková H, 2020. Detection of 200 km suspected impact crater Kotuyakanskaya near Popigai, Siberia, by new gravity aspects from EIGEN 6C4, and magnetic data from EMAG 2. *11th Planetary Crater Consortium*, Honolulu, Hawaii.

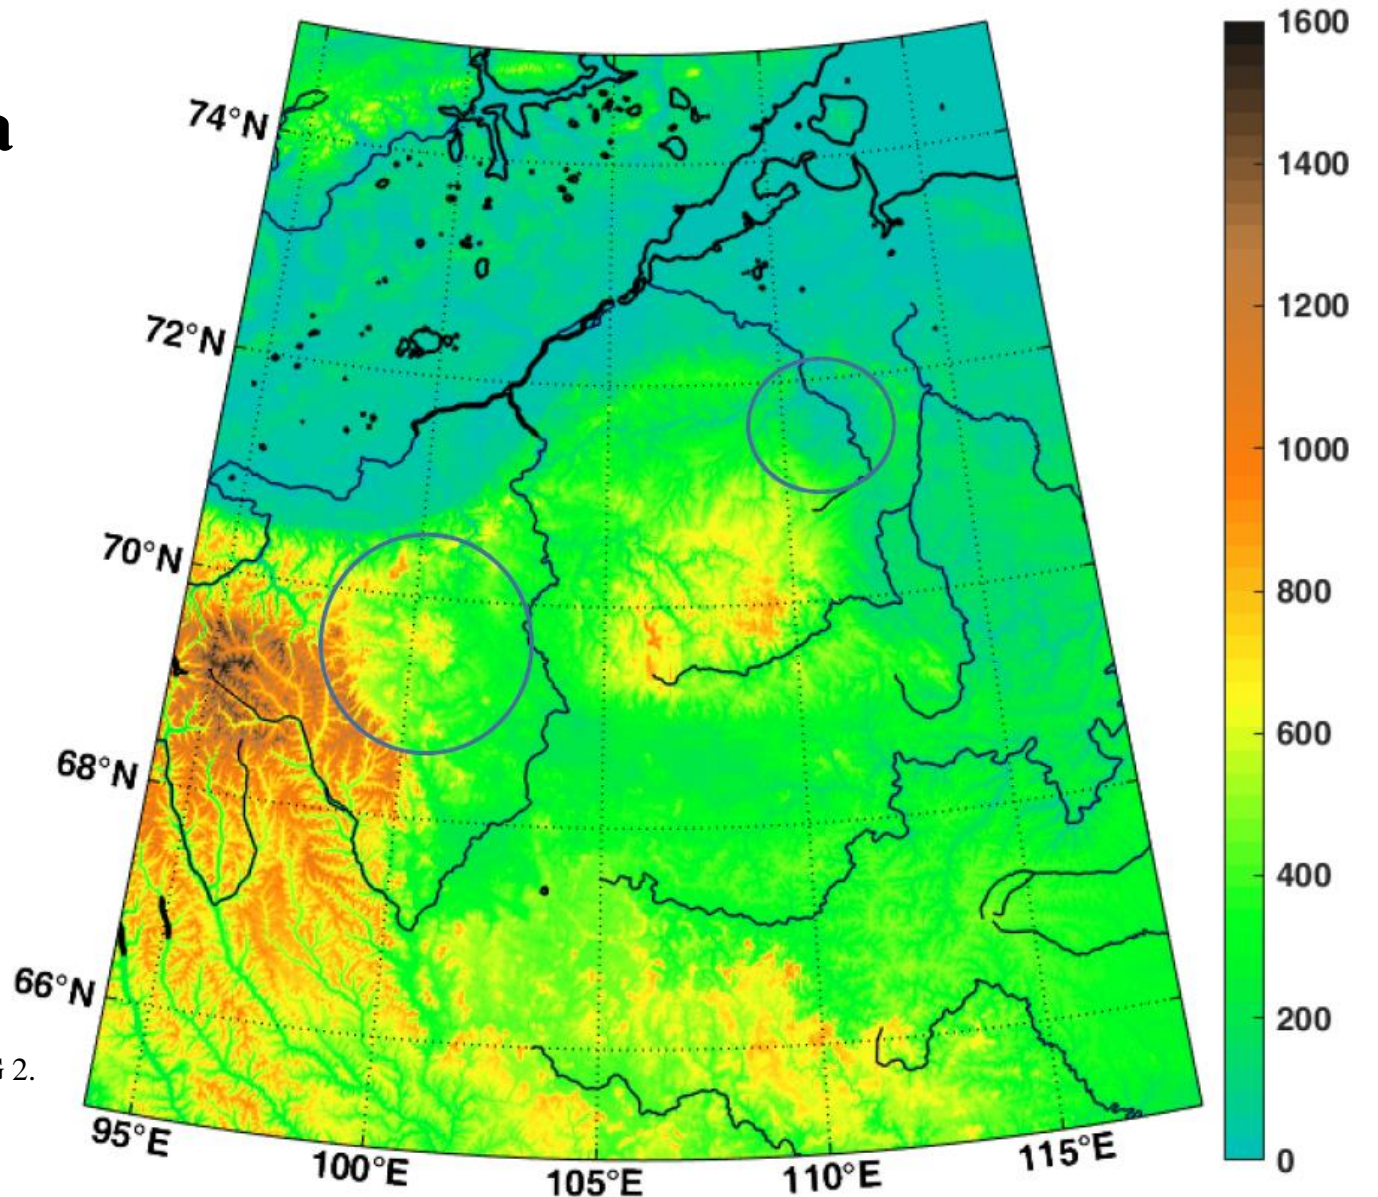

# Kotuyakanskaya

Popigai

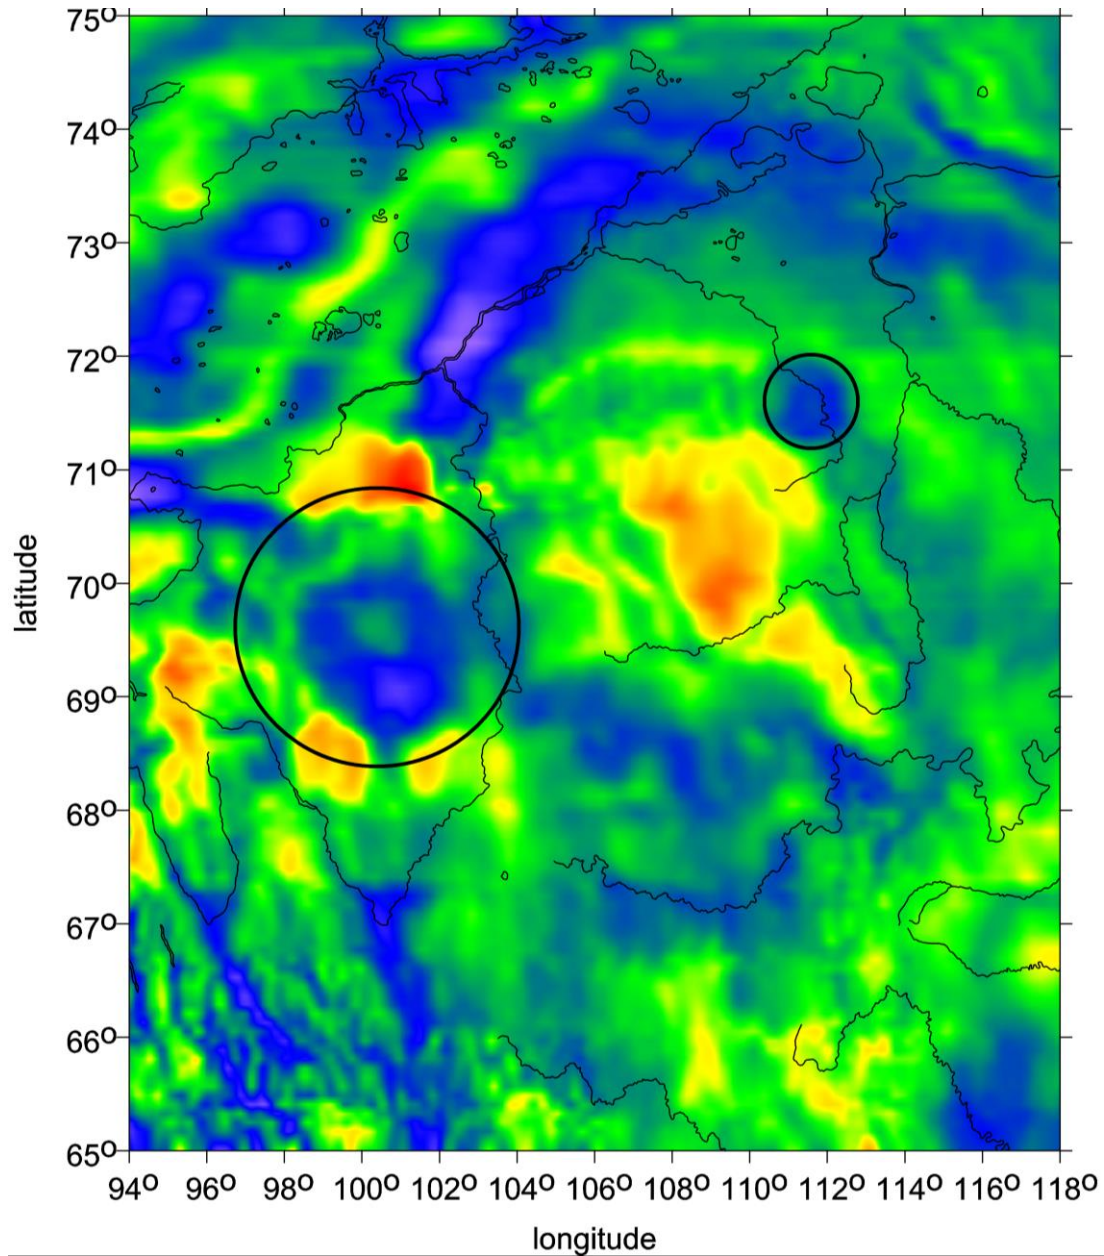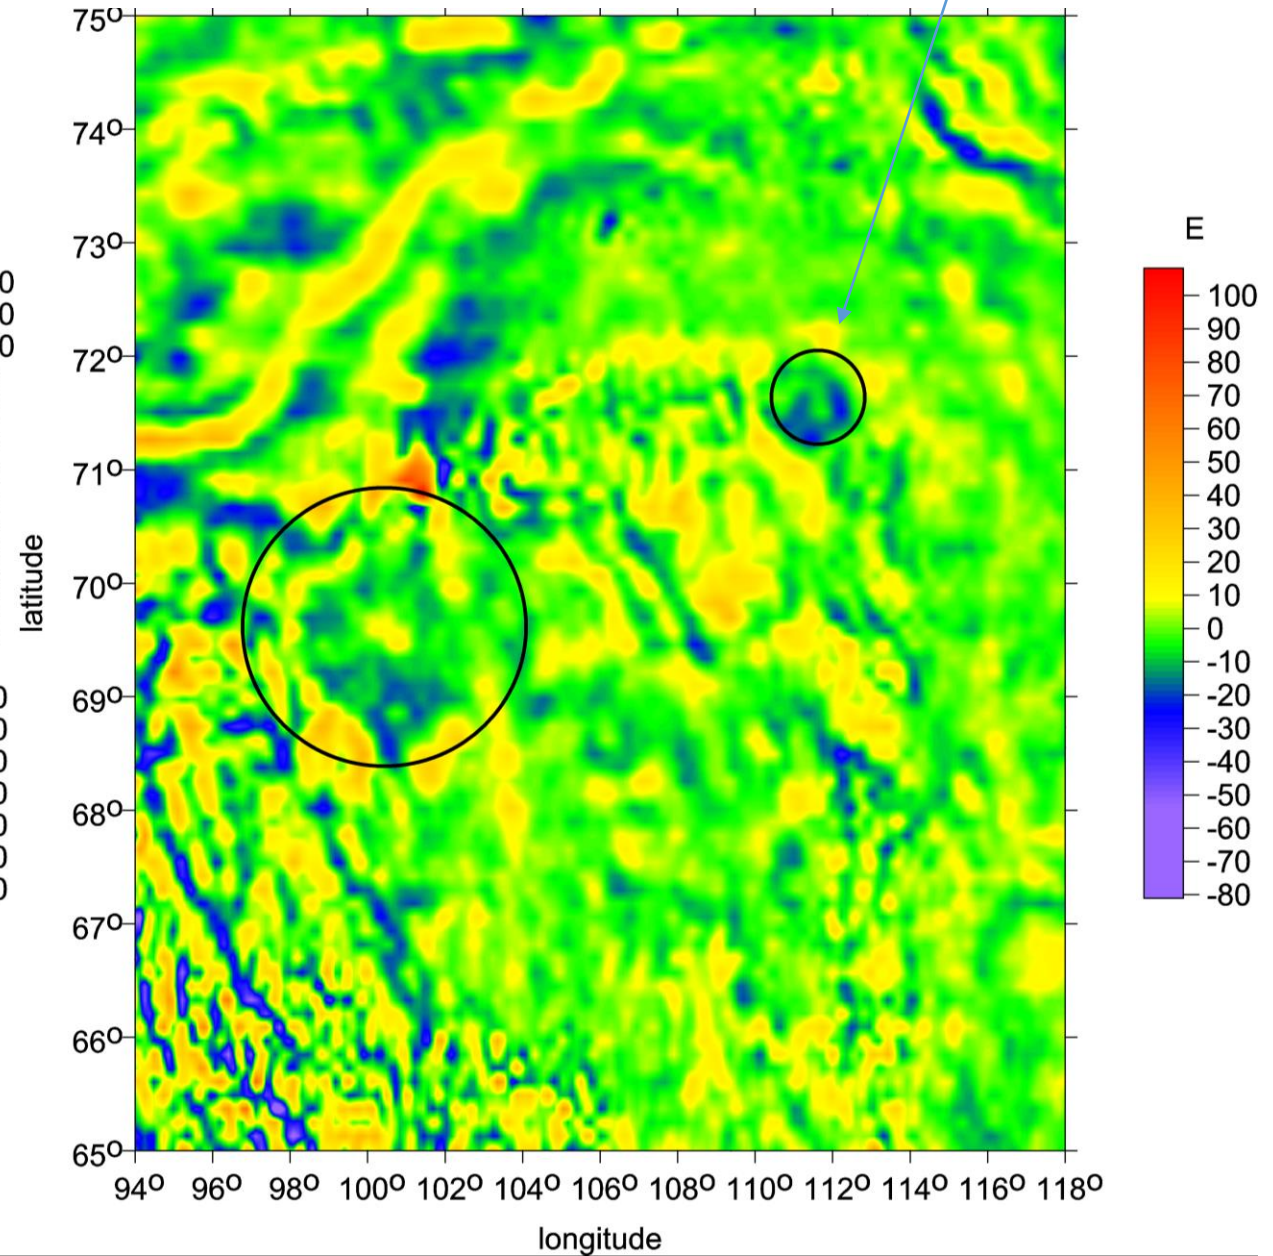

# Kotuyakanskaya series

near Popigai family

virtual deformations

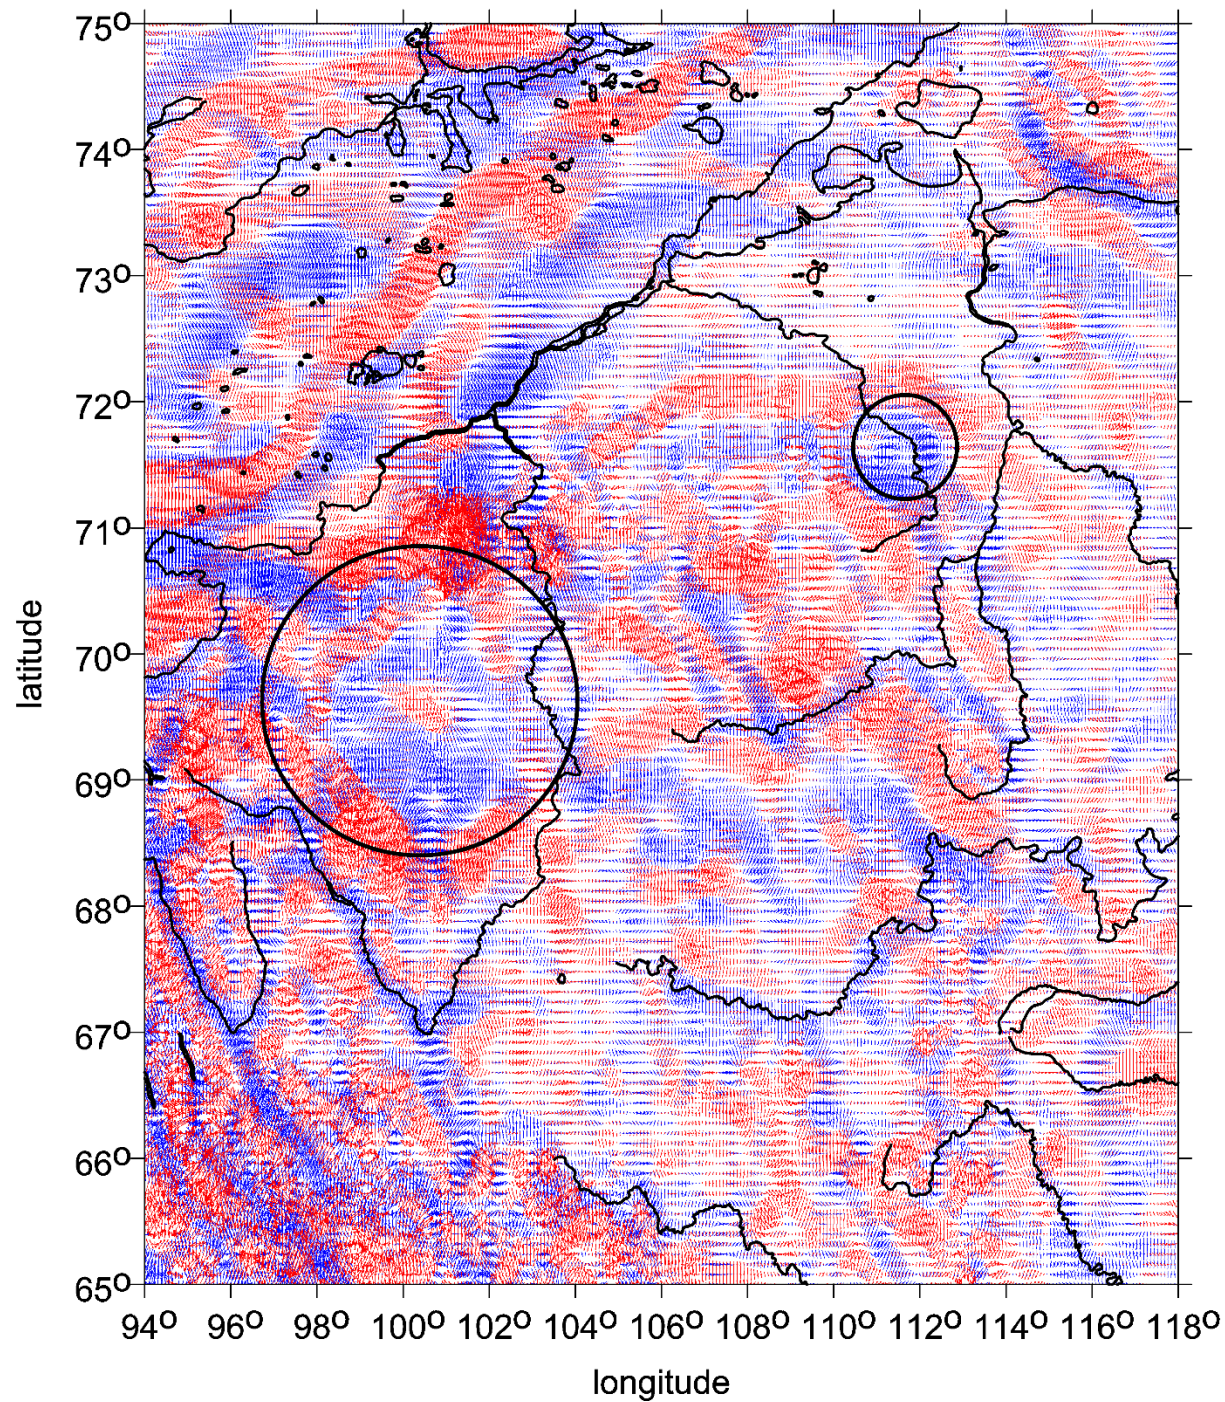



# Kotuyakanskaya

near Popigai family

magnetic intensities [nT]

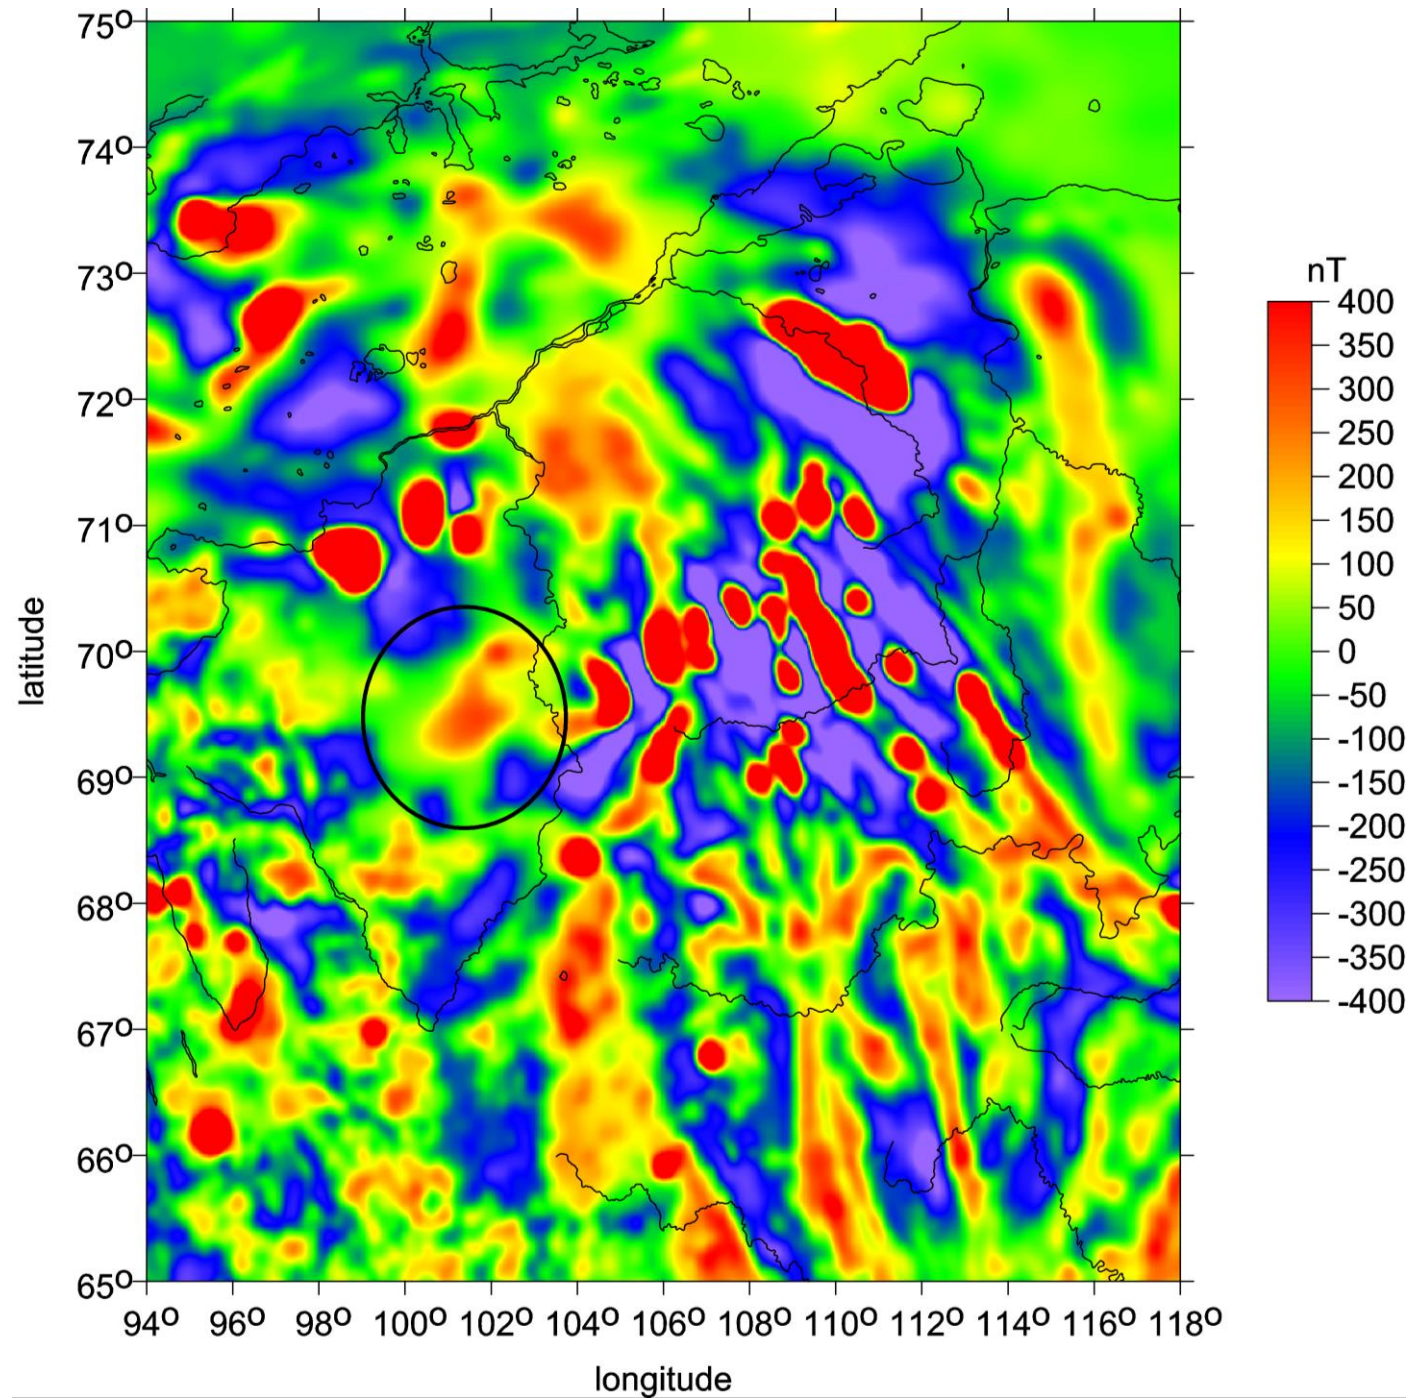

[www.asu.cas.cz/~jklokocn](http://www.asu.cas.cz/~jklokocn)  
[jklokocn@asu.cas.cz](mailto:jklokocn@asu.cas.cz)

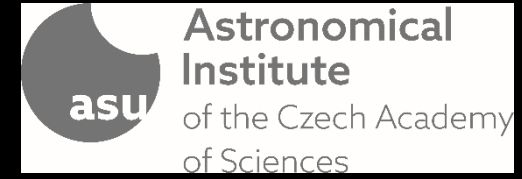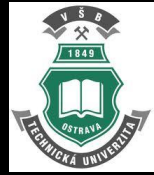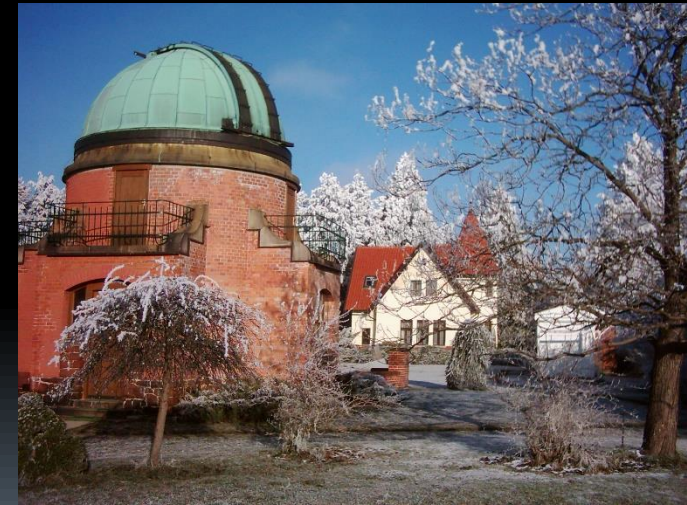

*The End of S3*
